# Supplementary material for: Evidence for Highly Variable, Region-Specific Patterns of T-Cell Epitope Mutations Accumulating in Mycobacterium tuberculosis Strains
Source: Front Immunol. 2019 Feb 13;10:195. doi: 10.3389/fimmu.2019.00195 (PMC6381025; doi:10.3389/fimmu.2019.00195)
Supplement: Supplementary File 6 — Details of intra-donor Mtb T-cell epitope mutations in six subjects. A total of 17 Mtb strains (range 2–5 strains) were isolated from 6 subjects (Patient ID: P6, P38, P96, P97, P103, and P106). The total number of Mtb strains isolated from each donor, along with number of mTCEs and mutated antigens identified in strains isolated over multiple time points is summarized in individual sheets of EXCEL this File for each of six donors tested. [file Data_Sheet_6.xlsx]

## Sheet: P6
Strain	epitope	RV_no	Description of protein	FC	positions mutated in epitope	strains	number of strain	Present in lineage	gene	epitope start (protein coords)	epitope stop (protein coords)	gene orient	epitope start (genomic coords)	epitope stop (genomic coords)	mutation position (protein coords within epitope)	mutation considered	mutation position (genomic coords)	mutation point in genome	description	Total # strains with this mutation	# strains from India with this mutation	% strains from india with this mutation	# strains from the rest of the world with this mutation	% strains from rest of world with this mutation	% strains from india / % strains from rest of world with this mutation	p-value Fischers Exact test	adjusted p values(BH)
M1011	53974	Rv3017c	ESAT-6 like protein EsxQ	Cell wall and cell processes	T->M,14	M1324_M1325_M1011	3	EAI	Rv3017c	101	120	-	3376503	3376562	14	T->M,14	3376522	3376522:G->A	CDS,7000008459999000,7000008459999001,ESAT-6 like protein EsxQ,trans_orient:-,loc_in_cds:341,codon_pos:2,codon:aCg-aTg,pep:T->M,Thr-114-Met,(NSY)	3	3	1.4	0	0	inf	< 0.0001	0.000218421
	189687	Rv2957	PGL/p-HBAD biosynthesis glycosyltransferase	Intermediary metabolism and respiration	V->M,4	M1324_M1325_M1011	3	EAI	Rv2957	249	257	+	3310224	3310250	4	V->M,4	3310233	3310233:G->A	CDS,7000008460005885,7000008460005886,PGL/p-HBAD biosynthesis glycosyltransferase,trans_orient:+,loc_in_cds:754,codon_pos:1,codon:Gtg-Atg,pep:V->M,Val-252-Met,(NSY)	3	3	1.4	0	0	inf	< 0.0001	0.000218421
	73593	Rv1980c	immunogenic protein Mpt64	Cell wall and cell processes	F->L,16	M1271_M1570_M1816_M984_H1249_H3094_M1324_M1325_M1011_M1961_M2140	11	EAI	Rv1980c	144	163	-	2223549	2223608	16	F->L,16	2223561	2223561:G->T	CDS,7000008459998952,7000008459998953,immunogenic protein MPT64,trans_orient:-,loc_in_cds:477,codon_pos:3,codon:ttC-ttA,pep:F->L,Phe-159-Leu,(NSY)	80	29	13.2	51	1	13.2	< 0.0001	0.000218421
	48458	Rv1980c	immunogenic protein Mpt64	Cell wall and cell processes	F->L,6	M1271_M1570_M1816_M984_H1249_H3094_M1324_M1325_M1011_M1961_M2140	11	EAI	Rv1980c	154	173	-	2223519	2223578	6	F->L,6	2223561	2223561:G->T	CDS,7000008459998952,7000008459998953,immunogenic protein MPT64,trans_orient:-,loc_in_cds:477,codon_pos:3,codon:ttC-ttA,pep:F->L,Phe-159-Leu,(NSY)	80	29	13.2	51	1	13.2	< 0.0001	0.000218421		mTCE enriched in India (18/66=27.3%)
	7472	Rv0934	phosphate ABC transporter substrate-binding lipoprotein PstS	Cell wall and cell processes	T->I,17	M1004_M1007_M1009_M1010_M1012_M1021_M1022_M1023_M1025_M1271_M1272_M1273_M1533_M1570_M1816_M2416_M984_M987_M990_M991_M992_M995_H1249_H1578_H1580_H1996_H2102_H2264_H2398_H2463_H2754_H2760_H3004_H3005_H3033_H3094_H3361_H3986_M1221_M1324_M1325_H2375_H2438_H3367_M1008_M1011_M1024_M1422_M1441_M1448_M1961_M2116_M2140_M2278	54	EAI	Rv0934	325	344	+	1043091	1043150	17	T->I,17	1043140	1043140:C->T	CDS,7000008459999687,7000008459999688,periplasmic phosphate-binding lipoprotein PstS1,trans_orient:+,loc_in_cds:1022,codon_pos:2,codon:aCc-aTc,pep:T->I,Thr-341-Ile,(NSY)	494	149	67.7	345	6.8	10	< 0.0001	0.000218421
	106585	Rv2628	hypothetical protein Rv2628	Conserved hypotheticals	S->L,14	M1004_M1007_M1009_M1010_M1012_M1021_M1022_M1023_M1025_M1271_M1272_M1273_M1533_M1570_M1816_M2416_M984_M987_M990_M991_M992_M995_H1249_H1578_H1580_H1996_H2102_H2264_H2398_H2463_H2754_H2760_H3004_H3005_H3033_H3094_H3361_H3986_M1221_M1324_M1325_H2375_H2438_H3367_M1008_M1011_M1024_M1422_M1441_M1448_M1961_M2116_M2140_M2278	54	EAI	Rv2628	46	60	+	2955203	2955247	14	S->L,14	2955243	2955243:C->T	CDS,7000008460009382,7000008460009384,hypothetical protein,trans_orient:+,loc_in_cds:176,codon_pos:2,codon:tCg-tTg,pep:S->L,Ser-59-Leu,(NSY)	579	149	67.7	430	8.4	8	< 0.0001	0.000218421
	57048	Rv3019c	ESAT-6 like protein EsxR	Cell wall and cell processes	W->C,18	M1010_M1271_M1273_M1533_M1570_M1816_M2416_M984_M991_M995_H1249_H1580_H2102_H2754_H2760_H3004_H3094_M1324_M1325_H3367_M1011_M1422_M1448_M1961_M2140_M2278	26	EAI	Rv3019c	41	60	-	3378832	3378891	18	W->C,18	3378838	3378838:C->A	CDS,7000008460013704,7000008460013705,secreted ESAT-6 like protein EsxR,trans_orient:-,loc_in_cds:174,codon_pos:3,codon:tgG-tgT,pep:W->C,Trp-58-Cys,(NSY)	391	71	32.3	320	6.3	5.1	< 0.0001	0.000218421
	75496	Rv3019c	ESAT-6 like protein EsxR	Cell wall and cell processes	W->C,8	M1010_M1271_M1273_M1533_M1570_M1816_M2416_M984_M991_M995_H1249_H1580_H2102_H2754_H2760_H3004_H3094_M1324_M1325_H3367_M1011_M1422_M1448_M1961_M2140_M2278	26	EAI	Rv3019c	51	70	-	3378802	3378861	8	W->C,8	3378838	3378838:C->A	CDS,7000008460013704,7000008460013705,secreted ESAT-6 like protein EsxR,trans_orient:-,loc_in_cds:174,codon_pos:3,codon:tgG-tgT,pep:W->C,Trp-58-Cys,(NSY)	391	71	32.3	320	6.3	5.1	< 0.0001	0.000218421
	155973	Rv1733c	transmembrane protein	Cell wall and cell processes	Q->H,18	M1004_M1007_M1009_M1010_M1012_M1017_M1021_M1022_M1023_M1025_M1271_M1272_M1273_M1533_M1559_M1570_M1782_M1816_M1848_M2416_M984_M987_M990_M991_M992_M995_H1249_H1329_H1578_H1580_H1856_H1964_H1996_H2101_H2102_H2264_H2398_H2463_H2581_H2754_H2760_H3004_H3005_H3033_H3094_H3360_H3361_H3986_M1221_M1292_M1324_M1325_M1545_M1780_M2084_M2085_M2323_M2324_H2300_H2375_H2438_H3367_M1008_M1011_M1024_M1422_M1441_M14…	74	BEI,CAS,EAI	Rv1733c	51	70	-	1960285	1960344	18	Q->H,18	1960291	1960291:C->A	CDS,7000008460014280,7000008460014281,transmembrane protein,trans_orient:-,loc_in_cds:204,codon_pos:3,codon:caG-caT,pep:Q->H,Gln-68-His,(NSY)	4875	219	99.5	4656	91.5	1.1	< 0.0001	0.000218421
	153959	Rv1733c	transmembrane protein	Cell wall and cell processes	Q->H,8	M1004_M1007_M1009_M1010_M1012_M1017_M1021_M1022_M1023_M1025_M1271_M1272_M1273_M1533_M1559_M1570_M1782_M1816_M1848_M2416_M984_M987_M990_M991_M992_M995_H1249_H1329_H1578_H1580_H1856_H1964_H1996_H2101_H2102_H2264_H2398_H2463_H2581_H2754_H2760_H3004_H3005_H3033_H3094_H3360_H3361_H3986_M1221_M1292_M1324_M1325_M1545_M1780_M2084_M2085_M2323_M2324_H2300_H2375_H2438_H3367_M1008_M1011_M1024_M1422_M1441_M14…	74	BEI,CAS,EAI	Rv1733c	61	80	-	1960255	1960314	8	Q->H,8	1960291	1960291:C->A	CDS,7000008460014280,7000008460014281,transmembrane protein,trans_orient:-,loc_in_cds:204,codon_pos:3,codon:caG-caT,pep:Q->H,Gln-68-His,(NSY)	4875	219	99.5	4656	91.5	1.1	< 0.0001	0.000218421
	179016	Rv3616c	ESX-1 secretion-associated protein EspA	Cell wall and cell processes	T->I,12	M1004_M1007_M1009_M1010_M1012_M1017_M1021_M1022_M1023_M1025_M1271_M1272_M1273_M1533_M1559_M1570_M1782_M1816_M1848_M2416_M984_M987_M990_M991_M992_M995_H1249_H1329_H1578_H1580_H1856_H1964_H1996_H2101_H2102_H2264_H2398_H2463_H2581_H2754_H2760_H3004_H3005_H3033_H3094_H3360_H3361_H3986_M1221_M1292_M1324_M1325_M1545_M1762_M1780_M2006_M2007_M2084_M2085_M2276_M2277_M2323_M2324_H2300_H2375_H2438_H3367_M10…	79	BEI,CAS,EAI	Rv3616c	181	195	-	4055970	4056014	12	T->I,12	4055980	4055980:G->A	CDS,7000008460015150,7000008460015151,ESX-1 secretion-associated protein EspA,trans_orient:-,loc_in_cds:575,codon_pos:2,codon:aCc-aTc,pep:T->I,Thr-192-Ile,(NSY)	5227	220	100	5007	98.4	1	0.0499	0.0537883		mTCE in equal proportion in India and outside India (8/66=12.1%)
	67588	Rv0589	Mce family protein Mce2A	Virulence, detoxification and adaptation	F->S,3	M1004_M1007_M1009_M1010_M1012_M1017_M1021_M1022_M1023_M1025_M1271_M1272_M1273_M1533_M1559_M1570_M1782_M1816_M1848_M2416_M984_M987_M990_M991_M992_M995_H1249_H1329_H1578_H1580_H1856_H1964_H1996_H2101_H2102_H2264_H2398_H2463_H2581_H2754_H2760_H3004_H3005_H3033_H3094_H3360_H3361_H3986_M1221_M1292_M1324_M1325_M1545_M1762_M1780_M2006_M2007_M2084_M2085_M2276_M2277_M2323_M2324_H2300_H2375_H2438_H3367_M10…	79	BEI,CAS,EAI	Rv0589	49	64	+	686968	687015	3	F->S,3	686975	686975:T->C	CDS,7000008460001901,7000008460001902,MCE-family protein Mce2A,trans_orient:+,loc_in_cds:152,codon_pos:2,codon:tTc-tCc,pep:F->S,Phe-51-Ser,(NSY)	5222	220	100	5002	98.3	1	0.0519	0.0552269
	178755	Rv1300	release factor glutamine methyltransferase	Intermediary metabolism and respiration	R->C,11	M1004_M1007_M1009_M1010_M1012_M1017_M1021_M1022_M1023_M1025_M1271_M1272_M1273_M1533_M1559_M1570_M1782_M1816_M1848_M2416_M984_M987_M990_M991_M992_M995_H1249_H1329_H1578_H1580_H1856_H1964_H1996_H2101_H2102_H2264_H2398_H2463_H2581_H2754_H2760_H3004_H3005_H3033_H3094_H3360_H3361_H3986_M1221_M1292_M1324_M1325_M1545_M1762_M1780_M2006_M2007_M2084_M2085_M2276_M2277_M2323_M2324_H2300_H2375_H2438_H3367_M10…	79	BEI,CAS,EAI	Rv1300	184	198	+	1457120	1457164	11	R->C,11	1457150	1457150:C->T	CDS,7000008460001535,7000008460001536,HemK protein,trans_orient:+,loc_in_cds:580,codon_pos:1,codon:Cgc-Tgc,pep:R->C,Arg-194-Cys,(NSY)	5228	220	100	5008	98.4	1	0.0498	0.0537883
M1324	53974	Rv3017c	ESAT-6 like protein EsxQ	Cell wall and cell processes	T->M,14	M1324_M1325_M1011	3	EAI	Rv3017c	101	120	-	3376503	3376562	14	T->M,14	3376522	3376522:G->A	CDS,7000008459999000,7000008459999001,ESAT-6 like protein EsxQ,trans_orient:-,loc_in_cds:341,codon_pos:2,codon:aCg-aTg,pep:T->M,Thr-114-Met,(NSY)	3	3	1.4	0	0	inf	< 0.0001	0.000218421
	189687	Rv2957	PGL/p-HBAD biosynthesis glycosyltransferase	Intermediary metabolism and respiration	V->M,4	M1324_M1325_M1011	3	EAI	Rv2957	249	257	+	3310224	3310250	4	V->M,4	3310233	3310233:G->A	CDS,7000008460005885,7000008460005886,PGL/p-HBAD biosynthesis glycosyltransferase,trans_orient:+,loc_in_cds:754,codon_pos:1,codon:Gtg-Atg,pep:V->M,Val-252-Met,(NSY)	3	3	1.4	0	0	inf	< 0.0001	0.000218421
	73593	Rv1980c	immunogenic protein Mpt64	Cell wall and cell processes	F->L,16	M1271_M1570_M1816_M984_H1249_H3094_M1324_M1325_M1011_M1961_M2140	11	EAI	Rv1980c	144	163	-	2223549	2223608	16	F->L,16	2223561	2223561:G->T	CDS,7000008459998952,7000008459998953,immunogenic protein MPT64,trans_orient:-,loc_in_cds:477,codon_pos:3,codon:ttC-ttA,pep:F->L,Phe-159-Leu,(NSY)	80	29	13.2	51	1	13.2	< 0.0001	0.000218421
	48458	Rv1980c	immunogenic protein Mpt64	Cell wall and cell processes	F->L,6	M1271_M1570_M1816_M984_H1249_H3094_M1324_M1325_M1011_M1961_M2140	11	EAI	Rv1980c	154	173	-	2223519	2223578	6	F->L,6	2223561	2223561:G->T	CDS,7000008459998952,7000008459998953,immunogenic protein MPT64,trans_orient:-,loc_in_cds:477,codon_pos:3,codon:ttC-ttA,pep:F->L,Phe-159-Leu,(NSY)	80	29	13.2	51	1	13.2	< 0.0001	0.000218421
	7472	Rv0934	phosphate ABC transporter substrate-binding lipoprotein PstS	Cell wall and cell processes	T->I,17	M1004_M1007_M1009_M1010_M1012_M1021_M1022_M1023_M1025_M1271_M1272_M1273_M1533_M1570_M1816_M2416_M984_M987_M990_M991_M992_M995_H1249_H1578_H1580_H1996_H2102_H2264_H2398_H2463_H2754_H2760_H3004_H3005_H3033_H3094_H3361_H3986_M1221_M1324_M1325_H2375_H2438_H3367_M1008_M1011_M1024_M1422_M1441_M1448_M1961_M2116_M2140_M2278	54	EAI	Rv0934	325	344	+	1043091	1043150	17	T->I,17	1043140	1043140:C->T	CDS,7000008459999687,7000008459999688,periplasmic phosphate-binding lipoprotein PstS1,trans_orient:+,loc_in_cds:1022,codon_pos:2,codon:aCc-aTc,pep:T->I,Thr-341-Ile,(NSY)	494	149	67.7	345	6.8	10	< 0.0001	0.000218421
	106585	Rv2628	hypothetical protein Rv2628	Conserved hypotheticals	S->L,14	M1004_M1007_M1009_M1010_M1012_M1021_M1022_M1023_M1025_M1271_M1272_M1273_M1533_M1570_M1816_M2416_M984_M987_M990_M991_M992_M995_H1249_H1578_H1580_H1996_H2102_H2264_H2398_H2463_H2754_H2760_H3004_H3005_H3033_H3094_H3361_H3986_M1221_M1324_M1325_H2375_H2438_H3367_M1008_M1011_M1024_M1422_M1441_M1448_M1961_M2116_M2140_M2278	54	EAI	Rv2628	46	60	+	2955203	2955247	14	S->L,14	2955243	2955243:C->T	CDS,7000008460009382,7000008460009384,hypothetical protein,trans_orient:+,loc_in_cds:176,codon_pos:2,codon:tCg-tTg,pep:S->L,Ser-59-Leu,(NSY)	579	149	67.7	430	8.4	8	< 0.0001	0.000218421
	57048	Rv3019c	ESAT-6 like protein EsxR	Cell wall and cell processes	W->C,18	M1010_M1271_M1273_M1533_M1570_M1816_M2416_M984_M991_M995_H1249_H1580_H2102_H2754_H2760_H3004_H3094_M1324_M1325_H3367_M1011_M1422_M1448_M1961_M2140_M2278	26	EAI	Rv3019c	41	60	-	3378832	3378891	18	W->C,18	3378838	3378838:C->A	CDS,7000008460013704,7000008460013705,secreted ESAT-6 like protein EsxR,trans_orient:-,loc_in_cds:174,codon_pos:3,codon:tgG-tgT,pep:W->C,Trp-58-Cys,(NSY)	391	71	32.3	320	6.3	5.1	< 0.0001	0.000218421
	75496	Rv3019c	ESAT-6 like protein EsxR	Cell wall and cell processes	W->C,8	M1010_M1271_M1273_M1533_M1570_M1816_M2416_M984_M991_M995_H1249_H1580_H2102_H2754_H2760_H3004_H3094_M1324_M1325_H3367_M1011_M1422_M1448_M1961_M2140_M2278	26	EAI	Rv3019c	51	70	-	3378802	3378861	8	W->C,8	3378838	3378838:C->A	CDS,7000008460013704,7000008460013705,secreted ESAT-6 like protein EsxR,trans_orient:-,loc_in_cds:174,codon_pos:3,codon:tgG-tgT,pep:W->C,Trp-58-Cys,(NSY)	391	71	32.3	320	6.3	5.1	< 0.0001	0.000218421
	155973	Rv1733c	transmembrane protein	Cell wall and cell processes	Q->H,18	M1004_M1007_M1009_M1010_M1012_M1017_M1021_M1022_M1023_M1025_M1271_M1272_M1273_M1533_M1559_M1570_M1782_M1816_M1848_M2416_M984_M987_M990_M991_M992_M995_H1249_H1329_H1578_H1580_H1856_H1964_H1996_H2101_H2102_H2264_H2398_H2463_H2581_H2754_H2760_H3004_H3005_H3033_H3094_H3360_H3361_H3986_M1221_M1292_M1324_M1325_M1545_M1780_M2084_M2085_M2323_M2324_H2300_H2375_H2438_H3367_M1008_M1011_M1024_M1422_M1441_M14…	74	BEI,CAS,EAI	Rv1733c	51	70	-	1960285	1960344	18	Q->H,18	1960291	1960291:C->A	CDS,7000008460014280,7000008460014281,transmembrane protein,trans_orient:-,loc_in_cds:204,codon_pos:3,codon:caG-caT,pep:Q->H,Gln-68-His,(NSY)	4875	219	99.5	4656	91.5	1.1	< 0.0001	0.000218421
	153959	Rv1733c	transmembrane protein	Cell wall and cell processes	Q->H,8	M1004_M1007_M1009_M1010_M1012_M1017_M1021_M1022_M1023_M1025_M1271_M1272_M1273_M1533_M1559_M1570_M1782_M1816_M1848_M2416_M984_M987_M990_M991_M992_M995_H1249_H1329_H1578_H1580_H1856_H1964_H1996_H2101_H2102_H2264_H2398_H2463_H2581_H2754_H2760_H3004_H3005_H3033_H3094_H3360_H3361_H3986_M1221_M1292_M1324_M1325_M1545_M1780_M2084_M2085_M2323_M2324_H2300_H2375_H2438_H3367_M1008_M1011_M1024_M1422_M1441_M14…	74	BEI,CAS,EAI	Rv1733c	61	80	-	1960255	1960314	8	Q->H,8	1960291	1960291:C->A	CDS,7000008460014280,7000008460014281,transmembrane protein,trans_orient:-,loc_in_cds:204,codon_pos:3,codon:caG-caT,pep:Q->H,Gln-68-His,(NSY)	4875	219	99.5	4656	91.5	1.1	< 0.0001	0.000218421
	179016	Rv3616c	ESX-1 secretion-associated protein EspA	Cell wall and cell processes	T->I,12	M1004_M1007_M1009_M1010_M1012_M1017_M1021_M1022_M1023_M1025_M1271_M1272_M1273_M1533_M1559_M1570_M1782_M1816_M1848_M2416_M984_M987_M990_M991_M992_M995_H1249_H1329_H1578_H1580_H1856_H1964_H1996_H2101_H2102_H2264_H2398_H2463_H2581_H2754_H2760_H3004_H3005_H3033_H3094_H3360_H3361_H3986_M1221_M1292_M1324_M1325_M1545_M1762_M1780_M2006_M2007_M2084_M2085_M2276_M2277_M2323_M2324_H2300_H2375_H2438_H3367_M10…	79	BEI,CAS,EAI	Rv3616c	181	195	-	4055970	4056014	12	T->I,12	4055980	4055980:G->A	CDS,7000008460015150,7000008460015151,ESX-1 secretion-associated protein EspA,trans_orient:-,loc_in_cds:575,codon_pos:2,codon:aCc-aTc,pep:T->I,Thr-192-Ile,(NSY)	5227	220	100	5007	98.4	1	0.0499	0.0537883
	67588	Rv0589	Mce family protein Mce2A	Virulence, detoxification and adaptation	F->S,3	M1004_M1007_M1009_M1010_M1012_M1017_M1021_M1022_M1023_M1025_M1271_M1272_M1273_M1533_M1559_M1570_M1782_M1816_M1848_M2416_M984_M987_M990_M991_M992_M995_H1249_H1329_H1578_H1580_H1856_H1964_H1996_H2101_H2102_H2264_H2398_H2463_H2581_H2754_H2760_H3004_H3005_H3033_H3094_H3360_H3361_H3986_M1221_M1292_M1324_M1325_M1545_M1762_M1780_M2006_M2007_M2084_M2085_M2276_M2277_M2323_M2324_H2300_H2375_H2438_H3367_M10…	79	BEI,CAS,EAI	Rv0589	49	64	+	686968	687015	3	F->S,3	686975	686975:T->C	CDS,7000008460001901,7000008460001902,MCE-family protein Mce2A,trans_orient:+,loc_in_cds:152,codon_pos:2,codon:tTc-tCc,pep:F->S,Phe-51-Ser,(NSY)	5222	220	100	5002	98.3	1	0.0519	0.0552269
	178755	Rv1300	release factor glutamine methyltransferase	Intermediary metabolism and respiration	R->C,11	M1004_M1007_M1009_M1010_M1012_M1017_M1021_M1022_M1023_M1025_M1271_M1272_M1273_M1533_M1559_M1570_M1782_M1816_M1848_M2416_M984_M987_M990_M991_M992_M995_H1249_H1329_H1578_H1580_H1856_H1964_H1996_H2101_H2102_H2264_H2398_H2463_H2581_H2754_H2760_H3004_H3005_H3033_H3094_H3360_H3361_H3986_M1221_M1292_M1324_M1325_M1545_M1762_M1780_M2006_M2007_M2084_M2085_M2276_M2277_M2323_M2324_H2300_H2375_H2438_H3367_M10…	79	BEI,CAS,EAI	Rv1300	184	198	+	1457120	1457164	11	R->C,11	1457150	1457150:C->T	CDS,7000008460001535,7000008460001536,HemK protein,trans_orient:+,loc_in_cds:580,codon_pos:1,codon:Cgc-Tgc,pep:R->C,Arg-194-Cys,(NSY)	5228	220	100	5008	98.4	1	0.0498	0.0537883
M1325	53974	Rv3017c	ESAT-6 like protein EsxQ	Cell wall and cell processes	T->M,14	M1324_M1325_M1011	3	EAI	Rv3017c	101	120	-	3376503	3376562	14	T->M,14	3376522	3376522:G->A	CDS,7000008459999000,7000008459999001,ESAT-6 like protein EsxQ,trans_orient:-,loc_in_cds:341,codon_pos:2,codon:aCg-aTg,pep:T->M,Thr-114-Met,(NSY)	3	3	1.4	0	0	inf	< 0.0001	0.000218421
	189687	Rv2957	PGL/p-HBAD biosynthesis glycosyltransferase	Intermediary metabolism and respiration	V->M,4	M1324_M1325_M1011	3	EAI	Rv2957	249	257	+	3310224	3310250	4	V->M,4	3310233	3310233:G->A	CDS,7000008460005885,7000008460005886,PGL/p-HBAD biosynthesis glycosyltransferase,trans_orient:+,loc_in_cds:754,codon_pos:1,codon:Gtg-Atg,pep:V->M,Val-252-Met,(NSY)	3	3	1.4	0	0	inf	< 0.0001	0.000218421
	73593	Rv1980c	immunogenic protein Mpt64	Cell wall and cell processes	F->L,16	M1271_M1570_M1816_M984_H1249_H3094_M1324_M1325_M1011_M1961_M2140	11	EAI	Rv1980c	144	163	-	2223549	2223608	16	F->L,16	2223561	2223561:G->T	CDS,7000008459998952,7000008459998953,immunogenic protein MPT64,trans_orient:-,loc_in_cds:477,codon_pos:3,codon:ttC-ttA,pep:F->L,Phe-159-Leu,(NSY)	80	29	13.2	51	1	13.2	< 0.0001	0.000218421
	48458	Rv1980c	immunogenic protein Mpt64	Cell wall and cell processes	F->L,6	M1271_M1570_M1816_M984_H1249_H3094_M1324_M1325_M1011_M1961_M2140	11	EAI	Rv1980c	154	173	-	2223519	2223578	6	F->L,6	2223561	2223561:G->T	CDS,7000008459998952,7000008459998953,immunogenic protein MPT64,trans_orient:-,loc_in_cds:477,codon_pos:3,codon:ttC-ttA,pep:F->L,Phe-159-Leu,(NSY)	80	29	13.2	51	1	13.2	< 0.0001	0.000218421		mTCE enriched in India (18/66=27.3%)
	7472	Rv0934	phosphate ABC transporter substrate-binding lipoprotein PstS	Cell wall and cell processes	T->I,17	M1004_M1007_M1009_M1010_M1012_M1021_M1022_M1023_M1025_M1271_M1272_M1273_M1533_M1570_M1816_M2416_M984_M987_M990_M991_M992_M995_H1249_H1578_H1580_H1996_H2102_H2264_H2398_H2463_H2754_H2760_H3004_H3005_H3033_H3094_H3361_H3986_M1221_M1324_M1325_H2375_H2438_H3367_M1008_M1011_M1024_M1422_M1441_M1448_M1961_M2116_M2140_M2278	54	EAI	Rv0934	325	344	+	1043091	1043150	17	T->I,17	1043140	1043140:C->T	CDS,7000008459999687,7000008459999688,periplasmic phosphate-binding lipoprotein PstS1,trans_orient:+,loc_in_cds:1022,codon_pos:2,codon:aCc-aTc,pep:T->I,Thr-341-Ile,(NSY)	494	149	67.7	345	6.8	10	< 0.0001	0.000218421
	106585	Rv2628	hypothetical protein Rv2628	Conserved hypotheticals	S->L,14	M1004_M1007_M1009_M1010_M1012_M1021_M1022_M1023_M1025_M1271_M1272_M1273_M1533_M1570_M1816_M2416_M984_M987_M990_M991_M992_M995_H1249_H1578_H1580_H1996_H2102_H2264_H2398_H2463_H2754_H2760_H3004_H3005_H3033_H3094_H3361_H3986_M1221_M1324_M1325_H2375_H2438_H3367_M1008_M1011_M1024_M1422_M1441_M1448_M1961_M2116_M2140_M2278	54	EAI	Rv2628	46	60	+	2955203	2955247	14	S->L,14	2955243	2955243:C->T	CDS,7000008460009382,7000008460009384,hypothetical protein,trans_orient:+,loc_in_cds:176,codon_pos:2,codon:tCg-tTg,pep:S->L,Ser-59-Leu,(NSY)	579	149	67.7	430	8.4	8	< 0.0001	0.000218421
	57048	Rv3019c	ESAT-6 like protein EsxR	Cell wall and cell processes	W->C,18	M1010_M1271_M1273_M1533_M1570_M1816_M2416_M984_M991_M995_H1249_H1580_H2102_H2754_H2760_H3004_H3094_M1324_M1325_H3367_M1011_M1422_M1448_M1961_M2140_M2278	26	EAI	Rv3019c	41	60	-	3378832	3378891	18	W->C,18	3378838	3378838:C->A	CDS,7000008460013704,7000008460013705,secreted ESAT-6 like protein EsxR,trans_orient:-,loc_in_cds:174,codon_pos:3,codon:tgG-tgT,pep:W->C,Trp-58-Cys,(NSY)	391	71	32.3	320	6.3	5.1	< 0.0001	0.000218421
	75496	Rv3019c	ESAT-6 like protein EsxR	Cell wall and cell processes	W->C,8	M1010_M1271_M1273_M1533_M1570_M1816_M2416_M984_M991_M995_H1249_H1580_H2102_H2754_H2760_H3004_H3094_M1324_M1325_H3367_M1011_M1422_M1448_M1961_M2140_M2278	26	EAI	Rv3019c	51	70	-	3378802	3378861	8	W->C,8	3378838	3378838:C->A	CDS,7000008460013704,7000008460013705,secreted ESAT-6 like protein EsxR,trans_orient:-,loc_in_cds:174,codon_pos:3,codon:tgG-tgT,pep:W->C,Trp-58-Cys,(NSY)	391	71	32.3	320	6.3	5.1	< 0.0001	0.000218421
	155973	Rv1733c	transmembrane protein	Cell wall and cell processes	Q->H,18	M1004_M1007_M1009_M1010_M1012_M1017_M1021_M1022_M1023_M1025_M1271_M1272_M1273_M1533_M1559_M1570_M1782_M1816_M1848_M2416_M984_M987_M990_M991_M992_M995_H1249_H1329_H1578_H1580_H1856_H1964_H1996_H2101_H2102_H2264_H2398_H2463_H2581_H2754_H2760_H3004_H3005_H3033_H3094_H3360_H3361_H3986_M1221_M1292_M1324_M1325_M1545_M1780_M2084_M2085_M2323_M2324_H2300_H2375_H2438_H3367_M1008_M1011_M1024_M1422_M1441_M14…	74	BEI,CAS,EAI	Rv1733c	51	70	-	1960285	1960344	18	Q->H,18	1960291	1960291:C->A	CDS,7000008460014280,7000008460014281,transmembrane protein,trans_orient:-,loc_in_cds:204,codon_pos:3,codon:caG-caT,pep:Q->H,Gln-68-His,(NSY)	4875	219	99.5	4656	91.5	1.1	< 0.0001	0.000218421
	153959	Rv1733c	transmembrane protein	Cell wall and cell processes	Q->H,8	M1004_M1007_M1009_M1010_M1012_M1017_M1021_M1022_M1023_M1025_M1271_M1272_M1273_M1533_M1559_M1570_M1782_M1816_M1848_M2416_M984_M987_M990_M991_M992_M995_H1249_H1329_H1578_H1580_H1856_H1964_H1996_H2101_H2102_H2264_H2398_H2463_H2581_H2754_H2760_H3004_H3005_H3033_H3094_H3360_H3361_H3986_M1221_M1292_M1324_M1325_M1545_M1780_M2084_M2085_M2323_M2324_H2300_H2375_H2438_H3367_M1008_M1011_M1024_M1422_M1441_M14…	74	BEI,CAS,EAI	Rv1733c	61	80	-	1960255	1960314	8	Q->H,8	1960291	1960291:C->A	CDS,7000008460014280,7000008460014281,transmembrane protein,trans_orient:-,loc_in_cds:204,codon_pos:3,codon:caG-caT,pep:Q->H,Gln-68-His,(NSY)	4875	219	99.5	4656	91.5	1.1	< 0.0001	0.000218421
	179016	Rv3616c	ESX-1 secretion-associated protein EspA	Cell wall and cell processes	T->I,12	M1004_M1007_M1009_M1010_M1012_M1017_M1021_M1022_M1023_M1025_M1271_M1272_M1273_M1533_M1559_M1570_M1782_M1816_M1848_M2416_M984_M987_M990_M991_M992_M995_H1249_H1329_H1578_H1580_H1856_H1964_H1996_H2101_H2102_H2264_H2398_H2463_H2581_H2754_H2760_H3004_H3005_H3033_H3094_H3360_H3361_H3986_M1221_M1292_M1324_M1325_M1545_M1762_M1780_M2006_M2007_M2084_M2085_M2276_M2277_M2323_M2324_H2300_H2375_H2438_H3367_M10…	79	BEI,CAS,EAI	Rv3616c	181	195	-	4055970	4056014	12	T->I,12	4055980	4055980:G->A	CDS,7000008460015150,7000008460015151,ESX-1 secretion-associated protein EspA,trans_orient:-,loc_in_cds:575,codon_pos:2,codon:aCc-aTc,pep:T->I,Thr-192-Ile,(NSY)	5227	220	100	5007	98.4	1	0.0499	0.0537883		mTCE in equal proportion in India and outside India (8/66=12.1%)
	67588	Rv0589	Mce family protein Mce2A	Virulence, detoxification and adaptation	F->S,3	M1004_M1007_M1009_M1010_M1012_M1017_M1021_M1022_M1023_M1025_M1271_M1272_M1273_M1533_M1559_M1570_M1782_M1816_M1848_M2416_M984_M987_M990_M991_M992_M995_H1249_H1329_H1578_H1580_H1856_H1964_H1996_H2101_H2102_H2264_H2398_H2463_H2581_H2754_H2760_H3004_H3005_H3033_H3094_H3360_H3361_H3986_M1221_M1292_M1324_M1325_M1545_M1762_M1780_M2006_M2007_M2084_M2085_M2276_M2277_M2323_M2324_H2300_H2375_H2438_H3367_M10…	79	BEI,CAS,EAI	Rv0589	49	64	+	686968	687015	3	F->S,3	686975	686975:T->C	CDS,7000008460001901,7000008460001902,MCE-family protein Mce2A,trans_orient:+,loc_in_cds:152,codon_pos:2,codon:tTc-tCc,pep:F->S,Phe-51-Ser,(NSY)	5222	220	100	5002	98.3	1	0.0519	0.0552269
	178755	Rv1300	release factor glutamine methyltransferase	Intermediary metabolism and respiration	R->C,11	M1004_M1007_M1009_M1010_M1012_M1017_M1021_M1022_M1023_M1025_M1271_M1272_M1273_M1533_M1559_M1570_M1782_M1816_M1848_M2416_M984_M987_M990_M991_M992_M995_H1249_H1329_H1578_H1580_H1856_H1964_H1996_H2101_H2102_H2264_H2398_H2463_H2581_H2754_H2760_H3004_H3005_H3033_H3094_H3360_H3361_H3986_M1221_M1292_M1324_M1325_M1545_M1762_M1780_M2006_M2007_M2084_M2085_M2276_M2277_M2323_M2324_H2300_H2375_H2438_H3367_M10…	79	BEI,CAS,EAI	Rv1300	184	198	+	1457120	1457164	11	R->C,11	1457150	1457150:C->T	CDS,7000008460001535,7000008460001536,HemK protein,trans_orient:+,loc_in_cds:580,codon_pos:1,codon:Cgc-Tgc,pep:R->C,Arg-194-Cys,(NSY)	5228	220	100	5008	98.4	1	0.0498	0.0537883
	Red text shows rapidly evolving epitopes
	NOTE: All three strains have 13 identical mutations in the same position of the 10 antigens. Strains M1011, M1324 and M1325 were isolated on 10/2001, 05/2002 amd 05/2002, respectively.
	mTCE exclusive in India (36/66=54.5%)
	mTCE enriched in India (18/66=27.3%)
	mTCE in equal proportion in India and outside India (8/66=12.1%)
	mTCE enriched outside India (4/66) =6.1%

## Sheet: P38
Strain	epitope	RV_no	Description of protein	FC	positions mutated in epitope	strains	number of strain	Present in lineage	gene	epitope start (protein coords)	epitope stop (protein coords)	gene orient	epitope start (genomic coords)	epitope stop (genomic coords)	mutation position (protein coords within epitope)	mutation considered	mutation position (genomic coords)	mutation point in genome	description	Total # strains with this mutation	# strains from India with this mutation	% strains from india with this mutation	# strains from the rest of the world with this mutation	% strains from rest of world with this mutation	% strains from india / % strains from rest of world with this mutation	p-value Fischers Exact test	adjusted p values(BH)
M1292	154515	Rv2029c	6-phosphofructokinase PfkB	Intermediary metabolism and respiration	L->F,11	M1017_M1559_H1964_H2101_M1292_M1545_M1762_M1780_M2006_M2007_M2276_M2277_M2323_M2324_M2479	15	CAS	Rv2029c	211	230	-	2275743	2275802	11	L->F,11	2275772	2275772:G->A	CDS,7000008460015213,7000008460015214,6-phosphofructokinase PfkB,trans_orient:-,loc_in_cds:661,codon_pos:1,codon:Ctc-Ttc,pep:L->F,Leu-221-Phe,(NSY)	431	38	17.3	393	7.7	2.2	< 0.0001	0.000218421
	155102	Rv2029c	6-phosphofructokinase PfkB	Intermediary metabolism and respiration	L->F,1	M1017_M1559_H1964_H2101_M1292_M1545_M1762_M1780_M2006_M2007_M2276_M2277_M2323_M2324_M2479	15	CAS	Rv2029c	221	240	-	2275713	2275772	1	L->F,1	2275772	2275772:G->A	CDS,7000008460015213,7000008460015214,6-phosphofructokinase PfkB,trans_orient:-,loc_in_cds:661,codon_pos:1,codon:Ctc-Ttc,pep:L->F,Leu-221-Phe,(NSY)	431	38	17.3	393	7.7	2.2	< 0.0001	0.000218421
	155973	Rv1733c	transmembrane protein	Cell wall and cell processes	Q->H,18	M1004_M1007_M1009_M1010_M1012_M1017_M1021_M1022_M1023_M1025_M1271_M1272_M1273_M1533_M1559_M1570_M1782_M1816_M1848_M2416_M984_M987_M990_M991_M992_M995_H1249_H1329_H1578_H1580_H1856_H1964_H1996_H2101_H2102_H2264_H2398_H2463_H2581_H2754_H2760_H3004_H3005_H3033_H3094_H3360_H3361_H3986_M1221_M1292_M1324_M1325_M1545_M1780_M2084_M2085_M2323_M2324_H2300_H2375_H2438_H3367_M1008_M1011_M1024_M1422_M1441_M14…	74	BEI,CAS,EAI	Rv1733c	51	70	-	1960285	1960344	18	Q->H,18	1960291	1960291:C->A	CDS,7000008460014280,7000008460014281,transmembrane protein,trans_orient:-,loc_in_cds:204,codon_pos:3,codon:caG-caT,pep:Q->H,Gln-68-His,(NSY)	4875	219	99.5	4656	91.5	1.1	< 0.0001	0.000218421
	153959	Rv1733c	transmembrane protein	Cell wall and cell processes	Q->H,8	M1004_M1007_M1009_M1010_M1012_M1017_M1021_M1022_M1023_M1025_M1271_M1272_M1273_M1533_M1559_M1570_M1782_M1816_M1848_M2416_M984_M987_M990_M991_M992_M995_H1249_H1329_H1578_H1580_H1856_H1964_H1996_H2101_H2102_H2264_H2398_H2463_H2581_H2754_H2760_H3004_H3005_H3033_H3094_H3360_H3361_H3986_M1221_M1292_M1324_M1325_M1545_M1780_M2084_M2085_M2323_M2324_H2300_H2375_H2438_H3367_M1008_M1011_M1024_M1422_M1441_M14…	74	BEI,CAS,EAI	Rv1733c	61	80	-	1960255	1960314	8	Q->H,8	1960291	1960291:C->A	CDS,7000008460014280,7000008460014281,transmembrane protein,trans_orient:-,loc_in_cds:204,codon_pos:3,codon:caG-caT,pep:Q->H,Gln-68-His,(NSY)	4875	219	99.5	4656	91.5	1.1	< 0.0001	0.000218421
	179016	Rv3616c	ESX-1 secretion-associated protein EspA	Cell wall and cell processes	T->I,12	M1004_M1007_M1009_M1010_M1012_M1017_M1021_M1022_M1023_M1025_M1271_M1272_M1273_M1533_M1559_M1570_M1782_M1816_M1848_M2416_M984_M987_M990_M991_M992_M995_H1249_H1329_H1578_H1580_H1856_H1964_H1996_H2101_H2102_H2264_H2398_H2463_H2581_H2754_H2760_H3004_H3005_H3033_H3094_H3360_H3361_H3986_M1221_M1292_M1324_M1325_M1545_M1762_M1780_M2006_M2007_M2084_M2085_M2276_M2277_M2323_M2324_H2300_H2375_H2438_H3367_M10…	79	BEI,CAS,EAI	Rv3616c	181	195	-	4055970	4056014	12	T->I,12	4055980	4055980:G->A	CDS,7000008460015150,7000008460015151,ESX-1 secretion-associated protein EspA,trans_orient:-,loc_in_cds:575,codon_pos:2,codon:aCc-aTc,pep:T->I,Thr-192-Ile,(NSY)	5227	220	100	5007	98.4	1	0.0499	0.0537883		mTCE in equal proportion in India and outside India (8/66=12.1%)
	67588	Rv0589	Mce family protein Mce2A	Virulence, detoxification and adaptation	F->S,3	M1004_M1007_M1009_M1010_M1012_M1017_M1021_M1022_M1023_M1025_M1271_M1272_M1273_M1533_M1559_M1570_M1782_M1816_M1848_M2416_M984_M987_M990_M991_M992_M995_H1249_H1329_H1578_H1580_H1856_H1964_H1996_H2101_H2102_H2264_H2398_H2463_H2581_H2754_H2760_H3004_H3005_H3033_H3094_H3360_H3361_H3986_M1221_M1292_M1324_M1325_M1545_M1762_M1780_M2006_M2007_M2084_M2085_M2276_M2277_M2323_M2324_H2300_H2375_H2438_H3367_M10…	79	BEI,CAS,EAI	Rv0589	49	64	+	686968	687015	3	F->S,3	686975	686975:T->C	CDS,7000008460001901,7000008460001902,MCE-family protein Mce2A,trans_orient:+,loc_in_cds:152,codon_pos:2,codon:tTc-tCc,pep:F->S,Phe-51-Ser,(NSY)	5222	220	100	5002	98.3	1	0.0519	0.0552269
	178755	Rv1300	release factor glutamine methyltransferase	Intermediary metabolism and respiration	R->C,11	M1004_M1007_M1009_M1010_M1012_M1017_M1021_M1022_M1023_M1025_M1271_M1272_M1273_M1533_M1559_M1570_M1782_M1816_M1848_M2416_M984_M987_M990_M991_M992_M995_H1249_H1329_H1578_H1580_H1856_H1964_H1996_H2101_H2102_H2264_H2398_H2463_H2581_H2754_H2760_H3004_H3005_H3033_H3094_H3360_H3361_H3986_M1221_M1292_M1324_M1325_M1545_M1762_M1780_M2006_M2007_M2084_M2085_M2276_M2277_M2323_M2324_H2300_H2375_H2438_H3367_M10…	79	BEI,CAS,EAI	Rv1300	184	198	+	1457120	1457164	11	R->C,11	1457150	1457150:C->T	CDS,7000008460001535,7000008460001536,HemK protein,trans_orient:+,loc_in_cds:580,codon_pos:1,codon:Cgc-Tgc,pep:R->C,Arg-194-Cys,(NSY)	5228	220	100	5008	98.4	1	0.0498	0.0537883
	144904	Rv1769	hypothetical protein Rv1769	Conserved hypotheticals	D->A,10	M1017_M1559_M1782_M1848_H1329_H1856_H1964_H2101_H2581_H3360_M1292_M1545_M1762_M1780_M2006_M2007_M2084_M2085_M2276_M2277_M2323_M2324_H2300_M2131_M2479	25	CAS,BEI	Rv1769	392	404	+	2003806	2003844	10	D->A,10	2003834	2003834:A->C	CDS,7000008460004281,7000008460004283,hypothetical protein,trans_orient:+,loc_in_cds:1202,codon_pos:2,codon:gAc-gCc,pep:D->A,Asp-401-Ala,(NSY)	1938	65	29.5	1873	36.8	0.8	0.0343	0.045816
M1545	154515	Rv2029c	6-phosphofructokinase PfkB	Intermediary metabolism and respiration	L->F,11	M1017_M1559_H1964_H2101_M1292_M1545_M1762_M1780_M2006_M2007_M2276_M2277_M2323_M2324_M2479	15	CAS	Rv2029c	211	230	-	2275743	2275802	11	L->F,11	2275772	2275772:G->A	CDS,7000008460015213,7000008460015214,6-phosphofructokinase PfkB,trans_orient:-,loc_in_cds:661,codon_pos:1,codon:Ctc-Ttc,pep:L->F,Leu-221-Phe,(NSY)	431	38	17.3	393	7.7	2.2	< 0.0001	0.000218421
	155102	Rv2029c	6-phosphofructokinase PfkB	Intermediary metabolism and respiration	L->F,1	M1017_M1559_H1964_H2101_M1292_M1545_M1762_M1780_M2006_M2007_M2276_M2277_M2323_M2324_M2479	15	CAS	Rv2029c	221	240	-	2275713	2275772	1	L->F,1	2275772	2275772:G->A	CDS,7000008460015213,7000008460015214,6-phosphofructokinase PfkB,trans_orient:-,loc_in_cds:661,codon_pos:1,codon:Ctc-Ttc,pep:L->F,Leu-221-Phe,(NSY)	431	38	17.3	393	7.7	2.2	< 0.0001	0.000218421
	155973	Rv1733c	transmembrane protein	Cell wall and cell processes	Q->H,18	M1004_M1007_M1009_M1010_M1012_M1017_M1021_M1022_M1023_M1025_M1271_M1272_M1273_M1533_M1559_M1570_M1782_M1816_M1848_M2416_M984_M987_M990_M991_M992_M995_H1249_H1329_H1578_H1580_H1856_H1964_H1996_H2101_H2102_H2264_H2398_H2463_H2581_H2754_H2760_H3004_H3005_H3033_H3094_H3360_H3361_H3986_M1221_M1292_M1324_M1325_M1545_M1780_M2084_M2085_M2323_M2324_H2300_H2375_H2438_H3367_M1008_M1011_M1024_M1422_M1441_M14…	74	BEI,CAS,EAI	Rv1733c	51	70	-	1960285	1960344	18	Q->H,18	1960291	1960291:C->A	CDS,7000008460014280,7000008460014281,transmembrane protein,trans_orient:-,loc_in_cds:204,codon_pos:3,codon:caG-caT,pep:Q->H,Gln-68-His,(NSY)	4875	219	99.5	4656	91.5	1.1	< 0.0001	0.000218421
	153959	Rv1733c	transmembrane protein	Cell wall and cell processes	Q->H,8	M1004_M1007_M1009_M1010_M1012_M1017_M1021_M1022_M1023_M1025_M1271_M1272_M1273_M1533_M1559_M1570_M1782_M1816_M1848_M2416_M984_M987_M990_M991_M992_M995_H1249_H1329_H1578_H1580_H1856_H1964_H1996_H2101_H2102_H2264_H2398_H2463_H2581_H2754_H2760_H3004_H3005_H3033_H3094_H3360_H3361_H3986_M1221_M1292_M1324_M1325_M1545_M1780_M2084_M2085_M2323_M2324_H2300_H2375_H2438_H3367_M1008_M1011_M1024_M1422_M1441_M14…	74	BEI,CAS,EAI	Rv1733c	61	80	-	1960255	1960314	8	Q->H,8	1960291	1960291:C->A	CDS,7000008460014280,7000008460014281,transmembrane protein,trans_orient:-,loc_in_cds:204,codon_pos:3,codon:caG-caT,pep:Q->H,Gln-68-His,(NSY)	4875	219	99.5	4656	91.5	1.1	< 0.0001	0.000218421
	179016	Rv3616c	ESX-1 secretion-associated protein EspA	Cell wall and cell processes	T->I,12	M1004_M1007_M1009_M1010_M1012_M1017_M1021_M1022_M1023_M1025_M1271_M1272_M1273_M1533_M1559_M1570_M1782_M1816_M1848_M2416_M984_M987_M990_M991_M992_M995_H1249_H1329_H1578_H1580_H1856_H1964_H1996_H2101_H2102_H2264_H2398_H2463_H2581_H2754_H2760_H3004_H3005_H3033_H3094_H3360_H3361_H3986_M1221_M1292_M1324_M1325_M1545_M1762_M1780_M2006_M2007_M2084_M2085_M2276_M2277_M2323_M2324_H2300_H2375_H2438_H3367_M10…	79	BEI,CAS,EAI	Rv3616c	181	195	-	4055970	4056014	12	T->I,12	4055980	4055980:G->A	CDS,7000008460015150,7000008460015151,ESX-1 secretion-associated protein EspA,trans_orient:-,loc_in_cds:575,codon_pos:2,codon:aCc-aTc,pep:T->I,Thr-192-Ile,(NSY)	5227	220	100	5007	98.4	1	0.0499	0.0537883		mTCE in equal proportion in India and outside India (8/66=12.1%)
	67588	Rv0589	Mce family protein Mce2A	Virulence, detoxification and adaptation	F->S,3	M1004_M1007_M1009_M1010_M1012_M1017_M1021_M1022_M1023_M1025_M1271_M1272_M1273_M1533_M1559_M1570_M1782_M1816_M1848_M2416_M984_M987_M990_M991_M992_M995_H1249_H1329_H1578_H1580_H1856_H1964_H1996_H2101_H2102_H2264_H2398_H2463_H2581_H2754_H2760_H3004_H3005_H3033_H3094_H3360_H3361_H3986_M1221_M1292_M1324_M1325_M1545_M1762_M1780_M2006_M2007_M2084_M2085_M2276_M2277_M2323_M2324_H2300_H2375_H2438_H3367_M10…	79	BEI,CAS,EAI	Rv0589	49	64	+	686968	687015	3	F->S,3	686975	686975:T->C	CDS,7000008460001901,7000008460001902,MCE-family protein Mce2A,trans_orient:+,loc_in_cds:152,codon_pos:2,codon:tTc-tCc,pep:F->S,Phe-51-Ser,(NSY)	5222	220	100	5002	98.3	1	0.0519	0.0552269
	178755	Rv1300	release factor glutamine methyltransferase	Intermediary metabolism and respiration	R->C,11	M1004_M1007_M1009_M1010_M1012_M1017_M1021_M1022_M1023_M1025_M1271_M1272_M1273_M1533_M1559_M1570_M1782_M1816_M1848_M2416_M984_M987_M990_M991_M992_M995_H1249_H1329_H1578_H1580_H1856_H1964_H1996_H2101_H2102_H2264_H2398_H2463_H2581_H2754_H2760_H3004_H3005_H3033_H3094_H3360_H3361_H3986_M1221_M1292_M1324_M1325_M1545_M1762_M1780_M2006_M2007_M2084_M2085_M2276_M2277_M2323_M2324_H2300_H2375_H2438_H3367_M10…	79	BEI,CAS,EAI	Rv1300	184	198	+	1457120	1457164	11	R->C,11	1457150	1457150:C->T	CDS,7000008460001535,7000008460001536,HemK protein,trans_orient:+,loc_in_cds:580,codon_pos:1,codon:Cgc-Tgc,pep:R->C,Arg-194-Cys,(NSY)	5228	220	100	5008	98.4	1	0.0498	0.0537883
	144904	Rv1769	hypothetical protein Rv1769	Conserved hypotheticals	D->A,10	M1017_M1559_M1782_M1848_H1329_H1856_H1964_H2101_H2581_H3360_M1292_M1545_M1762_M1780_M2006_M2007_M2084_M2085_M2276_M2277_M2323_M2324_H2300_M2131_M2479	25	CAS,BEI	Rv1769	392	404	+	2003806	2003844	10	D->A,10	2003834	2003834:A->C	CDS,7000008460004281,7000008460004283,hypothetical protein,trans_orient:+,loc_in_cds:1202,codon_pos:2,codon:gAc-gCc,pep:D->A,Asp-401-Ala,(NSY)	1938	65	29.5	1873	36.8	0.8	0.0343	0.045816
	Red text shows rapidly evolving epitopes
	NOTE: All two strains have 8 identical mutations in the same position of the 6 antigens. Strains M1292 and M1545 were isolated on 03/2002 and 09/2002, respectively.

## Sheet: P96
Strains	epitope	RV_no	Description of protein	FC	positions mutated in epitope	strains	number of strain	Present in lineage	gene	epitope start (protein coords)	epitope stop (protein coords)	gene orient	epitope start (genomic coords)	epitope stop (genomic coords)	mutation position (protein coords within epitope)	mutation considered	mutation position (genomic coords)	mutation point in genome	description	Total # strains with this mutation	# strains from India with this mutation	% strains from india with this mutation	# strains from the rest of the world with this mutation	% strains from rest of world with this mutation	% strains from india / % strains from rest of world with this mutation	p-value Fischers Exact test	adjusted p values(BH)
M2006	155973	Rv1733c	transmembrane protein	Cell wall and cell processes	T->I,15_Q->H,18	M1762_M2006_M2007_M2276_M2277	5	CAS	Rv1733c	51	70	-	1960285	1960344	15	T->I,15	1960301	1960301:G->A	CDS,7000008460014280,7000008460014281,transmembrane protein,trans_orient:-,loc_in_cds:194,codon_pos:2,codon:aCc-aTc,pep:T->I,Thr-65-Ile,(NSY)	5	5	2.3	0	0	inf	< 0.0001	0.000218421		mTCE exclusive in India (36/66=54.5%)
	153959	Rv1733c	transmembrane protein	Cell wall and cell processes	T->I,5_Q->H,8	M1762_M2006_M2007_M2276_M2277	5	CAS	Rv1733c	61	80	-	1960255	1960314	5	T->I,5	1960301	1960301:G->A	CDS,7000008460014280,7000008460014281,transmembrane protein,trans_orient:-,loc_in_cds:194,codon_pos:2,codon:aCc-aTc,pep:T->I,Thr-65-Ile,(NSY)	5	5	2.3	0	0	inf	< 0.0001	0.000218421
	154515	Rv2029c	6-phosphofructokinase PfkB	Intermediary metabolism and respiration	L->F,11	M1017_M1559_H1964_H2101_M1292_M1545_M1762_M1780_M2006_M2007_M2276_M2277_M2323_M2324_M2479	15	CAS	Rv2029c	211	230	-	2275743	2275802	11	L->F,11	2275772	2275772:G->A	CDS,7000008460015213,7000008460015214,6-phosphofructokinase PfkB,trans_orient:-,loc_in_cds:661,codon_pos:1,codon:Ctc-Ttc,pep:L->F,Leu-221-Phe,(NSY)	431	38	17.3	393	7.7	2.2	< 0.0001	0.000218421
	155102	Rv2029c	6-phosphofructokinase PfkB	Intermediary metabolism and respiration	L->F,1	M1017_M1559_H1964_H2101_M1292_M1545_M1762_M1780_M2006_M2007_M2276_M2277_M2323_M2324_M2479	15	CAS	Rv2029c	221	240	-	2275713	2275772	1	L->F,1	2275772	2275772:G->A	CDS,7000008460015213,7000008460015214,6-phosphofructokinase PfkB,trans_orient:-,loc_in_cds:661,codon_pos:1,codon:Ctc-Ttc,pep:L->F,Leu-221-Phe,(NSY)	431	38	17.3	393	7.7	2.2	< 0.0001	0.000218421
	155973	Rv1733c	transmembrane protein	Cell wall and cell processes	T->I,15_Q->H,18	M1762_M2006_M2007_M2276_M2277	5	CAS	Rv1733c	51	70	-	1960285	1960344	18	Q->H,18	1960291	1960291:C->A	CDS,7000008460014280,7000008460014281,transmembrane protein,trans_orient:-,loc_in_cds:204,codon_pos:3,codon:caG-caT,pep:Q->H,Gln-68-His,(NSY)	4875	219	99.5	4656	91.5	1.1	< 0.0001	0.000218421
	153959	Rv1733c	transmembrane protein	Cell wall and cell processes	T->I,5_Q->H,8	M1762_M2006_M2007_M2276_M2277	5	CAS	Rv1733c	61	80	-	1960255	1960314	8	Q->H,8	1960291	1960291:C->A	CDS,7000008460014280,7000008460014281,transmembrane protein,trans_orient:-,loc_in_cds:204,codon_pos:3,codon:caG-caT,pep:Q->H,Gln-68-His,(NSY)	4875	219	99.5	4656	91.5	1.1	< 0.0001	0.000218421
	179016	Rv3616c	ESX-1 secretion-associated protein EspA	Cell wall and cell processes	T->I,12	M1004_M1007_M1009_M1010_M1012_M1017_M1021_M1022_M1023_M1025_M1271_M1272_M1273_M1533_M1559_M1570_M1782_M1816_M1848_M2416_M984_M987_M990_M991_M992_M995_H1249_H1329_H1578_H1580_H1856_H1964_H1996_H2101_H2102_H2264_H2398_H2463_H2581_H2754_H2760_H3004_H3005_H3033_H3094_H3360_H3361_H3986_M1221_M1292_M1324_M1325_M1545_M1762_M1780_M2006_M2007_M2084_M2085_M2276_M2277_M2323_M2324_H2300_H2375_H2438_H3367_M10…	79	BEI,CAS,EAI	Rv3616c	181	195	-	4055970	4056014	12	T->I,12	4055980	4055980:G->A	CDS,7000008460015150,7000008460015151,ESX-1 secretion-associated protein EspA,trans_orient:-,loc_in_cds:575,codon_pos:2,codon:aCc-aTc,pep:T->I,Thr-192-Ile,(NSY)	5227	220	100	5007	98.4	1	0.0499	0.0537883		mTCE in equal proportion in India and outside India (8/66=12.1%)
	67588	Rv0589	Mce family protein Mce2A	Virulence, detoxification and adaptation	F->S,3	M1004_M1007_M1009_M1010_M1012_M1017_M1021_M1022_M1023_M1025_M1271_M1272_M1273_M1533_M1559_M1570_M1782_M1816_M1848_M2416_M984_M987_M990_M991_M992_M995_H1249_H1329_H1578_H1580_H1856_H1964_H1996_H2101_H2102_H2264_H2398_H2463_H2581_H2754_H2760_H3004_H3005_H3033_H3094_H3360_H3361_H3986_M1221_M1292_M1324_M1325_M1545_M1762_M1780_M2006_M2007_M2084_M2085_M2276_M2277_M2323_M2324_H2300_H2375_H2438_H3367_M10…	79	BEI,CAS,EAI	Rv0589	49	64	+	686968	687015	3	F->S,3	686975	686975:T->C	CDS,7000008460001901,7000008460001902,MCE-family protein Mce2A,trans_orient:+,loc_in_cds:152,codon_pos:2,codon:tTc-tCc,pep:F->S,Phe-51-Ser,(NSY)	5222	220	100	5002	98.3	1	0.0519	0.0552269
	178755	Rv1300	release factor glutamine methyltransferase	Intermediary metabolism and respiration	R->C,11	M1004_M1007_M1009_M1010_M1012_M1017_M1021_M1022_M1023_M1025_M1271_M1272_M1273_M1533_M1559_M1570_M1782_M1816_M1848_M2416_M984_M987_M990_M991_M992_M995_H1249_H1329_H1578_H1580_H1856_H1964_H1996_H2101_H2102_H2264_H2398_H2463_H2581_H2754_H2760_H3004_H3005_H3033_H3094_H3360_H3361_H3986_M1221_M1292_M1324_M1325_M1545_M1762_M1780_M2006_M2007_M2084_M2085_M2276_M2277_M2323_M2324_H2300_H2375_H2438_H3367_M10…	79	BEI,CAS,EAI	Rv1300	184	198	+	1457120	1457164	11	R->C,11	1457150	1457150:C->T	CDS,7000008460001535,7000008460001536,HemK protein,trans_orient:+,loc_in_cds:580,codon_pos:1,codon:Cgc-Tgc,pep:R->C,Arg-194-Cys,(NSY)	5228	220	100	5008	98.4	1	0.0498	0.0537883
	144904	Rv1769	hypothetical protein Rv1769	Conserved hypotheticals	D->A,10	M1017_M1559_M1782_M1848_H1329_H1856_H1964_H2101_H2581_H3360_M1292_M1545_M1762_M1780_M2006_M2007_M2084_M2085_M2276_M2277_M2323_M2324_H2300_M2131_M2479	25	CAS,BEI	Rv1769	392	404	+	2003806	2003844	10	D->A,10	2003834	2003834:A->C	CDS,7000008460004281,7000008460004283,hypothetical protein,trans_orient:+,loc_in_cds:1202,codon_pos:2,codon:gAc-gCc,pep:D->A,Asp-401-Ala,(NSY)	1938	65	29.5	1873	36.8	0.8	0.0343	0.045816
M2007	155973	Rv1733c	transmembrane protein	Cell wall and cell processes	T->I,15_Q->H,18	M1762_M2006_M2007_M2276_M2277	5	CAS	Rv1733c	51	70	-	1960285	1960344	15	T->I,15	1960301	1960301:G->A	CDS,7000008460014280,7000008460014281,transmembrane protein,trans_orient:-,loc_in_cds:194,codon_pos:2,codon:aCc-aTc,pep:T->I,Thr-65-Ile,(NSY)	5	5	2.3	0	0	inf	< 0.0001	0.000218421		mTCE exclusive in India (36/66=54.5%)
	153959	Rv1733c	transmembrane protein	Cell wall and cell processes	T->I,5_Q->H,8	M1762_M2006_M2007_M2276_M2277	5	CAS	Rv1733c	61	80	-	1960255	1960314	5	T->I,5	1960301	1960301:G->A	CDS,7000008460014280,7000008460014281,transmembrane protein,trans_orient:-,loc_in_cds:194,codon_pos:2,codon:aCc-aTc,pep:T->I,Thr-65-Ile,(NSY)	5	5	2.3	0	0	inf	< 0.0001	0.000218421
	154515	Rv2029c	6-phosphofructokinase PfkB	Intermediary metabolism and respiration	L->F,11	M1017_M1559_H1964_H2101_M1292_M1545_M1762_M1780_M2006_M2007_M2276_M2277_M2323_M2324_M2479	15	CAS	Rv2029c	211	230	-	2275743	2275802	11	L->F,11	2275772	2275772:G->A	CDS,7000008460015213,7000008460015214,6-phosphofructokinase PfkB,trans_orient:-,loc_in_cds:661,codon_pos:1,codon:Ctc-Ttc,pep:L->F,Leu-221-Phe,(NSY)	431	38	17.3	393	7.7	2.2	< 0.0001	0.000218421
	155102	Rv2029c	6-phosphofructokinase PfkB	Intermediary metabolism and respiration	L->F,1	M1017_M1559_H1964_H2101_M1292_M1545_M1762_M1780_M2006_M2007_M2276_M2277_M2323_M2324_M2479	15	CAS	Rv2029c	221	240	-	2275713	2275772	1	L->F,1	2275772	2275772:G->A	CDS,7000008460015213,7000008460015214,6-phosphofructokinase PfkB,trans_orient:-,loc_in_cds:661,codon_pos:1,codon:Ctc-Ttc,pep:L->F,Leu-221-Phe,(NSY)	431	38	17.3	393	7.7	2.2	< 0.0001	0.000218421
	155973	Rv1733c	transmembrane protein	Cell wall and cell processes	T->I,15_Q->H,18	M1762_M2006_M2007_M2276_M2277	5	CAS	Rv1733c	51	70	-	1960285	1960344	18	Q->H,18	1960291	1960291:C->A	CDS,7000008460014280,7000008460014281,transmembrane protein,trans_orient:-,loc_in_cds:204,codon_pos:3,codon:caG-caT,pep:Q->H,Gln-68-His,(NSY)	4875	219	99.5	4656	91.5	1.1	< 0.0001	0.000218421
	153959	Rv1733c	transmembrane protein	Cell wall and cell processes	T->I,5_Q->H,8	M1762_M2006_M2007_M2276_M2277	5	CAS	Rv1733c	61	80	-	1960255	1960314	8	Q->H,8	1960291	1960291:C->A	CDS,7000008460014280,7000008460014281,transmembrane protein,trans_orient:-,loc_in_cds:204,codon_pos:3,codon:caG-caT,pep:Q->H,Gln-68-His,(NSY)	4875	219	99.5	4656	91.5	1.1	< 0.0001	0.000218421
	179016	Rv3616c	ESX-1 secretion-associated protein EspA	Cell wall and cell processes	T->I,12	M1004_M1007_M1009_M1010_M1012_M1017_M1021_M1022_M1023_M1025_M1271_M1272_M1273_M1533_M1559_M1570_M1782_M1816_M1848_M2416_M984_M987_M990_M991_M992_M995_H1249_H1329_H1578_H1580_H1856_H1964_H1996_H2101_H2102_H2264_H2398_H2463_H2581_H2754_H2760_H3004_H3005_H3033_H3094_H3360_H3361_H3986_M1221_M1292_M1324_M1325_M1545_M1762_M1780_M2006_M2007_M2084_M2085_M2276_M2277_M2323_M2324_H2300_H2375_H2438_H3367_M10…	79	BEI,CAS,EAI	Rv3616c	181	195	-	4055970	4056014	12	T->I,12	4055980	4055980:G->A	CDS,7000008460015150,7000008460015151,ESX-1 secretion-associated protein EspA,trans_orient:-,loc_in_cds:575,codon_pos:2,codon:aCc-aTc,pep:T->I,Thr-192-Ile,(NSY)	5227	220	100	5007	98.4	1	0.0499	0.0537883		mTCE in equal proportion in India and outside India (8/66=12.1%)
	67588	Rv0589	Mce family protein Mce2A	Virulence, detoxification and adaptation	F->S,3	M1004_M1007_M1009_M1010_M1012_M1017_M1021_M1022_M1023_M1025_M1271_M1272_M1273_M1533_M1559_M1570_M1782_M1816_M1848_M2416_M984_M987_M990_M991_M992_M995_H1249_H1329_H1578_H1580_H1856_H1964_H1996_H2101_H2102_H2264_H2398_H2463_H2581_H2754_H2760_H3004_H3005_H3033_H3094_H3360_H3361_H3986_M1221_M1292_M1324_M1325_M1545_M1762_M1780_M2006_M2007_M2084_M2085_M2276_M2277_M2323_M2324_H2300_H2375_H2438_H3367_M10…	79	BEI,CAS,EAI	Rv0589	49	64	+	686968	687015	3	F->S,3	686975	686975:T->C	CDS,7000008460001901,7000008460001902,MCE-family protein Mce2A,trans_orient:+,loc_in_cds:152,codon_pos:2,codon:tTc-tCc,pep:F->S,Phe-51-Ser,(NSY)	5222	220	100	5002	98.3	1	0.0519	0.0552269
	178755	Rv1300	release factor glutamine methyltransferase	Intermediary metabolism and respiration	R->C,11	M1004_M1007_M1009_M1010_M1012_M1017_M1021_M1022_M1023_M1025_M1271_M1272_M1273_M1533_M1559_M1570_M1782_M1816_M1848_M2416_M984_M987_M990_M991_M992_M995_H1249_H1329_H1578_H1580_H1856_H1964_H1996_H2101_H2102_H2264_H2398_H2463_H2581_H2754_H2760_H3004_H3005_H3033_H3094_H3360_H3361_H3986_M1221_M1292_M1324_M1325_M1545_M1762_M1780_M2006_M2007_M2084_M2085_M2276_M2277_M2323_M2324_H2300_H2375_H2438_H3367_M10…	79	BEI,CAS,EAI	Rv1300	184	198	+	1457120	1457164	11	R->C,11	1457150	1457150:C->T	CDS,7000008460001535,7000008460001536,HemK protein,trans_orient:+,loc_in_cds:580,codon_pos:1,codon:Cgc-Tgc,pep:R->C,Arg-194-Cys,(NSY)	5228	220	100	5008	98.4	1	0.0498	0.0537883
	144904	Rv1769	hypothetical protein Rv1769	Conserved hypotheticals	D->A,10	M1017_M1559_M1782_M1848_H1329_H1856_H1964_H2101_H2581_H3360_M1292_M1545_M1762_M1780_M2006_M2007_M2084_M2085_M2276_M2277_M2323_M2324_H2300_M2131_M2479	25	CAS,BEI	Rv1769	392	404	+	2003806	2003844	10	D->A,10	2003834	2003834:A->C	CDS,7000008460004281,7000008460004283,hypothetical protein,trans_orient:+,loc_in_cds:1202,codon_pos:2,codon:gAc-gCc,pep:D->A,Asp-401-Ala,(NSY)	1938	65	29.5	1873	36.8	0.8	0.0343	0.045816
M2276	155973	Rv1733c	transmembrane protein	Cell wall and cell processes	T->I,15_Q->H,18	M1762_M2006_M2007_M2276_M2277	5	CAS	Rv1733c	51	70	-	1960285	1960344	15	T->I,15	1960301	1960301:G->A	CDS,7000008460014280,7000008460014281,transmembrane protein,trans_orient:-,loc_in_cds:194,codon_pos:2,codon:aCc-aTc,pep:T->I,Thr-65-Ile,(NSY)	5	5	2.3	0	0	inf	< 0.0001	0.000218421		mTCE exclusive in India (36/66=54.5%)
	153959	Rv1733c	transmembrane protein	Cell wall and cell processes	T->I,5_Q->H,8	M1762_M2006_M2007_M2276_M2277	5	CAS	Rv1733c	61	80	-	1960255	1960314	5	T->I,5	1960301	1960301:G->A	CDS,7000008460014280,7000008460014281,transmembrane protein,trans_orient:-,loc_in_cds:194,codon_pos:2,codon:aCc-aTc,pep:T->I,Thr-65-Ile,(NSY)	5	5	2.3	0	0	inf	< 0.0001	0.000218421
	154515	Rv2029c	6-phosphofructokinase PfkB	Intermediary metabolism and respiration	L->F,11	M1017_M1559_H1964_H2101_M1292_M1545_M1762_M1780_M2006_M2007_M2276_M2277_M2323_M2324_M2479	15	CAS	Rv2029c	211	230	-	2275743	2275802	11	L->F,11	2275772	2275772:G->A	CDS,7000008460015213,7000008460015214,6-phosphofructokinase PfkB,trans_orient:-,loc_in_cds:661,codon_pos:1,codon:Ctc-Ttc,pep:L->F,Leu-221-Phe,(NSY)	431	38	17.3	393	7.7	2.2	< 0.0001	0.000218421
	155102	Rv2029c	6-phosphofructokinase PfkB	Intermediary metabolism and respiration	L->F,1	M1017_M1559_H1964_H2101_M1292_M1545_M1762_M1780_M2006_M2007_M2276_M2277_M2323_M2324_M2479	15	CAS	Rv2029c	221	240	-	2275713	2275772	1	L->F,1	2275772	2275772:G->A	CDS,7000008460015213,7000008460015214,6-phosphofructokinase PfkB,trans_orient:-,loc_in_cds:661,codon_pos:1,codon:Ctc-Ttc,pep:L->F,Leu-221-Phe,(NSY)	431	38	17.3	393	7.7	2.2	< 0.0001	0.000218421
	155973	Rv1733c	transmembrane protein	Cell wall and cell processes	T->I,15_Q->H,18	M1762_M2006_M2007_M2276_M2277	5	CAS	Rv1733c	51	70	-	1960285	1960344	18	Q->H,18	1960291	1960291:C->A	CDS,7000008460014280,7000008460014281,transmembrane protein,trans_orient:-,loc_in_cds:204,codon_pos:3,codon:caG-caT,pep:Q->H,Gln-68-His,(NSY)	4875	219	99.5	4656	91.5	1.1	< 0.0001	0.000218421
	153959	Rv1733c	transmembrane protein	Cell wall and cell processes	T->I,5_Q->H,8	M1762_M2006_M2007_M2276_M2277	5	CAS	Rv1733c	61	80	-	1960255	1960314	8	Q->H,8	1960291	1960291:C->A	CDS,7000008460014280,7000008460014281,transmembrane protein,trans_orient:-,loc_in_cds:204,codon_pos:3,codon:caG-caT,pep:Q->H,Gln-68-His,(NSY)	4875	219	99.5	4656	91.5	1.1	< 0.0001	0.000218421
	179016	Rv3616c	ESX-1 secretion-associated protein EspA	Cell wall and cell processes	T->I,12	M1004_M1007_M1009_M1010_M1012_M1017_M1021_M1022_M1023_M1025_M1271_M1272_M1273_M1533_M1559_M1570_M1782_M1816_M1848_M2416_M984_M987_M990_M991_M992_M995_H1249_H1329_H1578_H1580_H1856_H1964_H1996_H2101_H2102_H2264_H2398_H2463_H2581_H2754_H2760_H3004_H3005_H3033_H3094_H3360_H3361_H3986_M1221_M1292_M1324_M1325_M1545_M1762_M1780_M2006_M2007_M2084_M2085_M2276_M2277_M2323_M2324_H2300_H2375_H2438_H3367_M10…	79	BEI,CAS,EAI	Rv3616c	181	195	-	4055970	4056014	12	T->I,12	4055980	4055980:G->A	CDS,7000008460015150,7000008460015151,ESX-1 secretion-associated protein EspA,trans_orient:-,loc_in_cds:575,codon_pos:2,codon:aCc-aTc,pep:T->I,Thr-192-Ile,(NSY)	5227	220	100	5007	98.4	1	0.0499	0.0537883		mTCE in equal proportion in India and outside India (8/66=12.1%)
	67588	Rv0589	Mce family protein Mce2A	Virulence, detoxification and adaptation	F->S,3	M1004_M1007_M1009_M1010_M1012_M1017_M1021_M1022_M1023_M1025_M1271_M1272_M1273_M1533_M1559_M1570_M1782_M1816_M1848_M2416_M984_M987_M990_M991_M992_M995_H1249_H1329_H1578_H1580_H1856_H1964_H1996_H2101_H2102_H2264_H2398_H2463_H2581_H2754_H2760_H3004_H3005_H3033_H3094_H3360_H3361_H3986_M1221_M1292_M1324_M1325_M1545_M1762_M1780_M2006_M2007_M2084_M2085_M2276_M2277_M2323_M2324_H2300_H2375_H2438_H3367_M10…	79	BEI,CAS,EAI	Rv0589	49	64	+	686968	687015	3	F->S,3	686975	686975:T->C	CDS,7000008460001901,7000008460001902,MCE-family protein Mce2A,trans_orient:+,loc_in_cds:152,codon_pos:2,codon:tTc-tCc,pep:F->S,Phe-51-Ser,(NSY)	5222	220	100	5002	98.3	1	0.0519	0.0552269
	178755	Rv1300	release factor glutamine methyltransferase	Intermediary metabolism and respiration	R->C,11	M1004_M1007_M1009_M1010_M1012_M1017_M1021_M1022_M1023_M1025_M1271_M1272_M1273_M1533_M1559_M1570_M1782_M1816_M1848_M2416_M984_M987_M990_M991_M992_M995_H1249_H1329_H1578_H1580_H1856_H1964_H1996_H2101_H2102_H2264_H2398_H2463_H2581_H2754_H2760_H3004_H3005_H3033_H3094_H3360_H3361_H3986_M1221_M1292_M1324_M1325_M1545_M1762_M1780_M2006_M2007_M2084_M2085_M2276_M2277_M2323_M2324_H2300_H2375_H2438_H3367_M10…	79	BEI,CAS,EAI	Rv1300	184	198	+	1457120	1457164	11	R->C,11	1457150	1457150:C->T	CDS,7000008460001535,7000008460001536,HemK protein,trans_orient:+,loc_in_cds:580,codon_pos:1,codon:Cgc-Tgc,pep:R->C,Arg-194-Cys,(NSY)	5228	220	100	5008	98.4	1	0.0498	0.0537883
	144904	Rv1769	hypothetical protein Rv1769	Conserved hypotheticals	D->A,10	M1017_M1559_M1782_M1848_H1329_H1856_H1964_H2101_H2581_H3360_M1292_M1545_M1762_M1780_M2006_M2007_M2084_M2085_M2276_M2277_M2323_M2324_H2300_M2131_M2479	25	CAS,BEI	Rv1769	392	404	+	2003806	2003844	10	D->A,10	2003834	2003834:A->C	CDS,7000008460004281,7000008460004283,hypothetical protein,trans_orient:+,loc_in_cds:1202,codon_pos:2,codon:gAc-gCc,pep:D->A,Asp-401-Ala,(NSY)	1938	65	29.5	1873	36.8	0.8	0.0343	0.045816
M2277	155973	Rv1733c	transmembrane protein	Cell wall and cell processes	T->I,15_Q->H,18	M1762_M2006_M2007_M2276_M2277	5	CAS	Rv1733c	51	70	-	1960285	1960344	15	T->I,15	1960301	1960301:G->A	CDS,7000008460014280,7000008460014281,transmembrane protein,trans_orient:-,loc_in_cds:194,codon_pos:2,codon:aCc-aTc,pep:T->I,Thr-65-Ile,(NSY)	5	5	2.3	0	0	inf	< 0.0001	0.000218421		mTCE exclusive in India (36/66=54.5%)
	153959	Rv1733c	transmembrane protein	Cell wall and cell processes	T->I,5_Q->H,8	M1762_M2006_M2007_M2276_M2277	5	CAS	Rv1733c	61	80	-	1960255	1960314	5	T->I,5	1960301	1960301:G->A	CDS,7000008460014280,7000008460014281,transmembrane protein,trans_orient:-,loc_in_cds:194,codon_pos:2,codon:aCc-aTc,pep:T->I,Thr-65-Ile,(NSY)	5	5	2.3	0	0	inf	< 0.0001	0.000218421
	154515	Rv2029c	6-phosphofructokinase PfkB	Intermediary metabolism and respiration	L->F,11	M1017_M1559_H1964_H2101_M1292_M1545_M1762_M1780_M2006_M2007_M2276_M2277_M2323_M2324_M2479	15	CAS	Rv2029c	211	230	-	2275743	2275802	11	L->F,11	2275772	2275772:G->A	CDS,7000008460015213,7000008460015214,6-phosphofructokinase PfkB,trans_orient:-,loc_in_cds:661,codon_pos:1,codon:Ctc-Ttc,pep:L->F,Leu-221-Phe,(NSY)	431	38	17.3	393	7.7	2.2	< 0.0001	0.000218421
	155102	Rv2029c	6-phosphofructokinase PfkB	Intermediary metabolism and respiration	L->F,1	M1017_M1559_H1964_H2101_M1292_M1545_M1762_M1780_M2006_M2007_M2276_M2277_M2323_M2324_M2479	15	CAS	Rv2029c	221	240	-	2275713	2275772	1	L->F,1	2275772	2275772:G->A	CDS,7000008460015213,7000008460015214,6-phosphofructokinase PfkB,trans_orient:-,loc_in_cds:661,codon_pos:1,codon:Ctc-Ttc,pep:L->F,Leu-221-Phe,(NSY)	431	38	17.3	393	7.7	2.2	< 0.0001	0.000218421
	155973	Rv1733c	transmembrane protein	Cell wall and cell processes	T->I,15_Q->H,18	M1762_M2006_M2007_M2276_M2277	5	CAS	Rv1733c	51	70	-	1960285	1960344	18	Q->H,18	1960291	1960291:C->A	CDS,7000008460014280,7000008460014281,transmembrane protein,trans_orient:-,loc_in_cds:204,codon_pos:3,codon:caG-caT,pep:Q->H,Gln-68-His,(NSY)	4875	219	99.5	4656	91.5	1.1	< 0.0001	0.000218421
	153959	Rv1733c	transmembrane protein	Cell wall and cell processes	T->I,5_Q->H,8	M1762_M2006_M2007_M2276_M2277	5	CAS	Rv1733c	61	80	-	1960255	1960314	8	Q->H,8	1960291	1960291:C->A	CDS,7000008460014280,7000008460014281,transmembrane protein,trans_orient:-,loc_in_cds:204,codon_pos:3,codon:caG-caT,pep:Q->H,Gln-68-His,(NSY)	4875	219	99.5	4656	91.5	1.1	< 0.0001	0.000218421
	179016	Rv3616c	ESX-1 secretion-associated protein EspA	Cell wall and cell processes	T->I,12	M1004_M1007_M1009_M1010_M1012_M1017_M1021_M1022_M1023_M1025_M1271_M1272_M1273_M1533_M1559_M1570_M1782_M1816_M1848_M2416_M984_M987_M990_M991_M992_M995_H1249_H1329_H1578_H1580_H1856_H1964_H1996_H2101_H2102_H2264_H2398_H2463_H2581_H2754_H2760_H3004_H3005_H3033_H3094_H3360_H3361_H3986_M1221_M1292_M1324_M1325_M1545_M1762_M1780_M2006_M2007_M2084_M2085_M2276_M2277_M2323_M2324_H2300_H2375_H2438_H3367_M10…	79	BEI,CAS,EAI	Rv3616c	181	195	-	4055970	4056014	12	T->I,12	4055980	4055980:G->A	CDS,7000008460015150,7000008460015151,ESX-1 secretion-associated protein EspA,trans_orient:-,loc_in_cds:575,codon_pos:2,codon:aCc-aTc,pep:T->I,Thr-192-Ile,(NSY)	5227	220	100	5007	98.4	1	0.0499	0.0537883		mTCE in equal proportion in India and outside India (8/66=12.1%)
	67588	Rv0589	Mce family protein Mce2A	Virulence, detoxification and adaptation	F->S,3	M1004_M1007_M1009_M1010_M1012_M1017_M1021_M1022_M1023_M1025_M1271_M1272_M1273_M1533_M1559_M1570_M1782_M1816_M1848_M2416_M984_M987_M990_M991_M992_M995_H1249_H1329_H1578_H1580_H1856_H1964_H1996_H2101_H2102_H2264_H2398_H2463_H2581_H2754_H2760_H3004_H3005_H3033_H3094_H3360_H3361_H3986_M1221_M1292_M1324_M1325_M1545_M1762_M1780_M2006_M2007_M2084_M2085_M2276_M2277_M2323_M2324_H2300_H2375_H2438_H3367_M10…	79	BEI,CAS,EAI	Rv0589	49	64	+	686968	687015	3	F->S,3	686975	686975:T->C	CDS,7000008460001901,7000008460001902,MCE-family protein Mce2A,trans_orient:+,loc_in_cds:152,codon_pos:2,codon:tTc-tCc,pep:F->S,Phe-51-Ser,(NSY)	5222	220	100	5002	98.3	1	0.0519	0.0552269
	178755	Rv1300	release factor glutamine methyltransferase	Intermediary metabolism and respiration	R->C,11	M1004_M1007_M1009_M1010_M1012_M1017_M1021_M1022_M1023_M1025_M1271_M1272_M1273_M1533_M1559_M1570_M1782_M1816_M1848_M2416_M984_M987_M990_M991_M992_M995_H1249_H1329_H1578_H1580_H1856_H1964_H1996_H2101_H2102_H2264_H2398_H2463_H2581_H2754_H2760_H3004_H3005_H3033_H3094_H3360_H3361_H3986_M1221_M1292_M1324_M1325_M1545_M1762_M1780_M2006_M2007_M2084_M2085_M2276_M2277_M2323_M2324_H2300_H2375_H2438_H3367_M10…	79	BEI,CAS,EAI	Rv1300	184	198	+	1457120	1457164	11	R->C,11	1457150	1457150:C->T	CDS,7000008460001535,7000008460001536,HemK protein,trans_orient:+,loc_in_cds:580,codon_pos:1,codon:Cgc-Tgc,pep:R->C,Arg-194-Cys,(NSY)	5228	220	100	5008	98.4	1	0.0498	0.0537883
	144904	Rv1769	hypothetical protein Rv1769	Conserved hypotheticals	D->A,10	M1017_M1559_M1782_M1848_H1329_H1856_H1964_H2101_H2581_H3360_M1292_M1545_M1762_M1780_M2006_M2007_M2084_M2085_M2276_M2277_M2323_M2324_H2300_M2131_M2479	25	CAS,BEI	Rv1769	392	404	+	2003806	2003844	10	D->A,10	2003834	2003834:A->C	CDS,7000008460004281,7000008460004283,hypothetical protein,trans_orient:+,loc_in_cds:1202,codon_pos:2,codon:gAc-gCc,pep:D->A,Asp-401-Ala,(NSY)	1938	65	29.5	1873	36.8	0.8	0.0343	0.045816
M1762	155973	Rv1733c	transmembrane protein	Cell wall and cell processes	T->I,15_Q->H,18	M1762_M2006_M2007_M2276_M2277	5	CAS	Rv1733c	51	70	-	1960285	1960344	15	T->I,15	1960301	1960301:G->A	CDS,7000008460014280,7000008460014281,transmembrane protein,trans_orient:-,loc_in_cds:194,codon_pos:2,codon:aCc-aTc,pep:T->I,Thr-65-Ile,(NSY)	5	5	2.3	0	0	inf	< 0.0001	0.000218421		mTCE exclusive in India (36/66=54.5%)
	153959	Rv1733c	transmembrane protein	Cell wall and cell processes	T->I,5_Q->H,8	M1762_M2006_M2007_M2276_M2277	5	CAS	Rv1733c	61	80	-	1960255	1960314	5	T->I,5	1960301	1960301:G->A	CDS,7000008460014280,7000008460014281,transmembrane protein,trans_orient:-,loc_in_cds:194,codon_pos:2,codon:aCc-aTc,pep:T->I,Thr-65-Ile,(NSY)	5	5	2.3	0	0	inf	< 0.0001	0.000218421
	154515	Rv2029c	6-phosphofructokinase PfkB	Intermediary metabolism and respiration	L->F,11	M1017_M1559_H1964_H2101_M1292_M1545_M1762_M1780_M2006_M2007_M2276_M2277_M2323_M2324_M2479	15	CAS	Rv2029c	211	230	-	2275743	2275802	11	L->F,11	2275772	2275772:G->A	CDS,7000008460015213,7000008460015214,6-phosphofructokinase PfkB,trans_orient:-,loc_in_cds:661,codon_pos:1,codon:Ctc-Ttc,pep:L->F,Leu-221-Phe,(NSY)	431	38	17.3	393	7.7	2.2	< 0.0001	0.000218421
	155102	Rv2029c	6-phosphofructokinase PfkB	Intermediary metabolism and respiration	L->F,1	M1017_M1559_H1964_H2101_M1292_M1545_M1762_M1780_M2006_M2007_M2276_M2277_M2323_M2324_M2479	15	CAS	Rv2029c	221	240	-	2275713	2275772	1	L->F,1	2275772	2275772:G->A	CDS,7000008460015213,7000008460015214,6-phosphofructokinase PfkB,trans_orient:-,loc_in_cds:661,codon_pos:1,codon:Ctc-Ttc,pep:L->F,Leu-221-Phe,(NSY)	431	38	17.3	393	7.7	2.2	< 0.0001	0.000218421
	155973	Rv1733c	transmembrane protein	Cell wall and cell processes	T->I,15_Q->H,18	M1762_M2006_M2007_M2276_M2277	5	CAS	Rv1733c	51	70	-	1960285	1960344	18	Q->H,18	1960291	1960291:C->A	CDS,7000008460014280,7000008460014281,transmembrane protein,trans_orient:-,loc_in_cds:204,codon_pos:3,codon:caG-caT,pep:Q->H,Gln-68-His,(NSY)	4875	219	99.5	4656	91.5	1.1	< 0.0001	0.000218421
	153959	Rv1733c	transmembrane protein	Cell wall and cell processes	T->I,5_Q->H,8	M1762_M2006_M2007_M2276_M2277	5	CAS	Rv1733c	61	80	-	1960255	1960314	8	Q->H,8	1960291	1960291:C->A	CDS,7000008460014280,7000008460014281,transmembrane protein,trans_orient:-,loc_in_cds:204,codon_pos:3,codon:caG-caT,pep:Q->H,Gln-68-His,(NSY)	4875	219	99.5	4656	91.5	1.1	< 0.0001	0.000218421
	179016	Rv3616c	ESX-1 secretion-associated protein EspA	Cell wall and cell processes	T->I,12	M1004_M1007_M1009_M1010_M1012_M1017_M1021_M1022_M1023_M1025_M1271_M1272_M1273_M1533_M1559_M1570_M1782_M1816_M1848_M2416_M984_M987_M990_M991_M992_M995_H1249_H1329_H1578_H1580_H1856_H1964_H1996_H2101_H2102_H2264_H2398_H2463_H2581_H2754_H2760_H3004_H3005_H3033_H3094_H3360_H3361_H3986_M1221_M1292_M1324_M1325_M1545_M1762_M1780_M2006_M2007_M2084_M2085_M2276_M2277_M2323_M2324_H2300_H2375_H2438_H3367_M10…	79	BEI,CAS,EAI	Rv3616c	181	195	-	4055970	4056014	12	T->I,12	4055980	4055980:G->A	CDS,7000008460015150,7000008460015151,ESX-1 secretion-associated protein EspA,trans_orient:-,loc_in_cds:575,codon_pos:2,codon:aCc-aTc,pep:T->I,Thr-192-Ile,(NSY)	5227	220	100	5007	98.4	1	0.0499	0.0537883		mTCE in equal proportion in India and outside India (8/66=12.1%)
	67588	Rv0589	Mce family protein Mce2A	Virulence, detoxification and adaptation	F->S,3	M1004_M1007_M1009_M1010_M1012_M1017_M1021_M1022_M1023_M1025_M1271_M1272_M1273_M1533_M1559_M1570_M1782_M1816_M1848_M2416_M984_M987_M990_M991_M992_M995_H1249_H1329_H1578_H1580_H1856_H1964_H1996_H2101_H2102_H2264_H2398_H2463_H2581_H2754_H2760_H3004_H3005_H3033_H3094_H3360_H3361_H3986_M1221_M1292_M1324_M1325_M1545_M1762_M1780_M2006_M2007_M2084_M2085_M2276_M2277_M2323_M2324_H2300_H2375_H2438_H3367_M10…	79	BEI,CAS,EAI	Rv0589	49	64	+	686968	687015	3	F->S,3	686975	686975:T->C	CDS,7000008460001901,7000008460001902,MCE-family protein Mce2A,trans_orient:+,loc_in_cds:152,codon_pos:2,codon:tTc-tCc,pep:F->S,Phe-51-Ser,(NSY)	5222	220	100	5002	98.3	1	0.0519	0.0552269
	178755	Rv1300	release factor glutamine methyltransferase	Intermediary metabolism and respiration	R->C,11	M1004_M1007_M1009_M1010_M1012_M1017_M1021_M1022_M1023_M1025_M1271_M1272_M1273_M1533_M1559_M1570_M1782_M1816_M1848_M2416_M984_M987_M990_M991_M992_M995_H1249_H1329_H1578_H1580_H1856_H1964_H1996_H2101_H2102_H2264_H2398_H2463_H2581_H2754_H2760_H3004_H3005_H3033_H3094_H3360_H3361_H3986_M1221_M1292_M1324_M1325_M1545_M1762_M1780_M2006_M2007_M2084_M2085_M2276_M2277_M2323_M2324_H2300_H2375_H2438_H3367_M10…	79	BEI,CAS,EAI	Rv1300	184	198	+	1457120	1457164	11	R->C,11	1457150	1457150:C->T	CDS,7000008460001535,7000008460001536,HemK protein,trans_orient:+,loc_in_cds:580,codon_pos:1,codon:Cgc-Tgc,pep:R->C,Arg-194-Cys,(NSY)	5228	220	100	5008	98.4	1	0.0498	0.0537883
	144904	Rv1769	hypothetical protein Rv1769	Conserved hypotheticals	D->A,10	M1017_M1559_M1782_M1848_H1329_H1856_H1964_H2101_H2581_H3360_M1292_M1545_M1762_M1780_M2006_M2007_M2084_M2085_M2276_M2277_M2323_M2324_H2300_M2131_M2479	25	CAS,BEI	Rv1769	392	404	+	2003806	2003844	10	D->A,10	2003834	2003834:A->C	CDS,7000008460004281,7000008460004283,hypothetical protein,trans_orient:+,loc_in_cds:1202,codon_pos:2,codon:gAc-gCc,pep:D->A,Asp-401-Ala,(NSY)	1938	65	29.5	1873	36.8	0.8	0.0343	0.045816
	Red text shows rapidly evolving epitopes
	NOTE: All five strains have 10 identical mutations in the same position of the 6 antigens. Strains M2006, M2007, M2276, M2277 and M1762 were isolated on 04/2003, 04/2003, 08/2003, 8/2003 and 01/2003, respectively.

## Sheet: P97
Strains	epitope	RV_no	Description of protein	FC	positions mutated in epitope	strains	number of strain	Present in lineage	gene	epitope start (protein coords)	epitope stop (protein coords)	gene orient	epitope start (genomic coords)	epitope stop (genomic coords)	mutation position (protein coords within epitope)	mutation considered	mutation position (genomic coords)	mutation point in genome	description	Total # strains with this mutation	# strains from India with this mutation	% strains from india with this mutation	# strains from the rest of the world with this mutation	% strains from rest of world with this mutation	% strains from india / % strains from rest of world with this mutation	p-value Fischers Exact test	adjusted p values(BH)
M2323	154515	Rv2029c	6-phosphofructokinase PfkB	Intermediary metabolism and respiration	L->F,11	M1017_M1559_H1964_H2101_M1292_M1545_M1762_M1780_M2006_M2007_M2276_M2277_M2323_M2324_M2479	15	CAS	Rv2029c	211	230	-	2275743	2275802	11	L->F,11	2275772	2275772:G->A	CDS,7000008460015213,7000008460015214,6-phosphofructokinase PfkB,trans_orient:-,loc_in_cds:661,codon_pos:1,codon:Ctc-Ttc,pep:L->F,Leu-221-Phe,(NSY)	431	38	17.3	393	7.7	2.2	< 0.0001	0.000218421
	155102	Rv2029c	6-phosphofructokinase PfkB	Intermediary metabolism and respiration	L->F,1	M1017_M1559_H1964_H2101_M1292_M1545_M1762_M1780_M2006_M2007_M2276_M2277_M2323_M2324_M2479	15	CAS	Rv2029c	221	240	-	2275713	2275772	1	L->F,1	2275772	2275772:G->A	CDS,7000008460015213,7000008460015214,6-phosphofructokinase PfkB,trans_orient:-,loc_in_cds:661,codon_pos:1,codon:Ctc-Ttc,pep:L->F,Leu-221-Phe,(NSY)	431	38	17.3	393	7.7	2.2	< 0.0001	0.000218421
	155973	Rv1733c	transmembrane protein	Cell wall and cell processes	Q->H,18	M1004_M1007_M1009_M1010_M1012_M1017_M1021_M1022_M1023_M1025_M1271_M1272_M1273_M1533_M1559_M1570_M1782_M1816_M1848_M2416_M984_M987_M990_M991_M992_M995_H1249_H1329_H1578_H1580_H1856_H1964_H1996_H2101_H2102_H2264_H2398_H2463_H2581_H2754_H2760_H3004_H3005_H3033_H3094_H3360_H3361_H3986_M1221_M1292_M1324_M1325_M1545_M1780_M2084_M2085_M2323_M2324_H2300_H2375_H2438_H3367_M1008_M1011_M1024_M1422_M1441_M14…	74	BEI,CAS,EAI	Rv1733c	51	70	-	1960285	1960344	18	Q->H,18	1960291	1960291:C->A	CDS,7000008460014280,7000008460014281,transmembrane protein,trans_orient:-,loc_in_cds:204,codon_pos:3,codon:caG-caT,pep:Q->H,Gln-68-His,(NSY)	4875	219	99.5	4656	91.5	1.1	< 0.0001	0.000218421
	153959	Rv1733c	transmembrane protein	Cell wall and cell processes	Q->H,8	M1004_M1007_M1009_M1010_M1012_M1017_M1021_M1022_M1023_M1025_M1271_M1272_M1273_M1533_M1559_M1570_M1782_M1816_M1848_M2416_M984_M987_M990_M991_M992_M995_H1249_H1329_H1578_H1580_H1856_H1964_H1996_H2101_H2102_H2264_H2398_H2463_H2581_H2754_H2760_H3004_H3005_H3033_H3094_H3360_H3361_H3986_M1221_M1292_M1324_M1325_M1545_M1780_M2084_M2085_M2323_M2324_H2300_H2375_H2438_H3367_M1008_M1011_M1024_M1422_M1441_M14…	74	BEI,CAS,EAI	Rv1733c	61	80	-	1960255	1960314	8	Q->H,8	1960291	1960291:C->A	CDS,7000008460014280,7000008460014281,transmembrane protein,trans_orient:-,loc_in_cds:204,codon_pos:3,codon:caG-caT,pep:Q->H,Gln-68-His,(NSY)	4875	219	99.5	4656	91.5	1.1	< 0.0001	0.000218421
	179016	Rv3616c	ESX-1 secretion-associated protein EspA	Cell wall and cell processes	T->I,12	M1004_M1007_M1009_M1010_M1012_M1017_M1021_M1022_M1023_M1025_M1271_M1272_M1273_M1533_M1559_M1570_M1782_M1816_M1848_M2416_M984_M987_M990_M991_M992_M995_H1249_H1329_H1578_H1580_H1856_H1964_H1996_H2101_H2102_H2264_H2398_H2463_H2581_H2754_H2760_H3004_H3005_H3033_H3094_H3360_H3361_H3986_M1221_M1292_M1324_M1325_M1545_M1762_M1780_M2006_M2007_M2084_M2085_M2276_M2277_M2323_M2324_H2300_H2375_H2438_H3367_M10…	79	BEI,CAS,EAI	Rv3616c	181	195	-	4055970	4056014	12	T->I,12	4055980	4055980:G->A	CDS,7000008460015150,7000008460015151,ESX-1 secretion-associated protein EspA,trans_orient:-,loc_in_cds:575,codon_pos:2,codon:aCc-aTc,pep:T->I,Thr-192-Ile,(NSY)	5227	220	100	5007	98.4	1	0.0499	0.0537883
	67588	Rv0589	Mce family protein Mce2A	Virulence, detoxification and adaptation	F->S,3	M1004_M1007_M1009_M1010_M1012_M1017_M1021_M1022_M1023_M1025_M1271_M1272_M1273_M1533_M1559_M1570_M1782_M1816_M1848_M2416_M984_M987_M990_M991_M992_M995_H1249_H1329_H1578_H1580_H1856_H1964_H1996_H2101_H2102_H2264_H2398_H2463_H2581_H2754_H2760_H3004_H3005_H3033_H3094_H3360_H3361_H3986_M1221_M1292_M1324_M1325_M1545_M1762_M1780_M2006_M2007_M2084_M2085_M2276_M2277_M2323_M2324_H2300_H2375_H2438_H3367_M10…	79	BEI,CAS,EAI	Rv0589	49	64	+	686968	687015	3	F->S,3	686975	686975:T->C	CDS,7000008460001901,7000008460001902,MCE-family protein Mce2A,trans_orient:+,loc_in_cds:152,codon_pos:2,codon:tTc-tCc,pep:F->S,Phe-51-Ser,(NSY)	5222	220	100	5002	98.3	1	0.0519	0.0552269
	178755	Rv1300	release factor glutamine methyltransferase	Intermediary metabolism and respiration	R->C,11	M1004_M1007_M1009_M1010_M1012_M1017_M1021_M1022_M1023_M1025_M1271_M1272_M1273_M1533_M1559_M1570_M1782_M1816_M1848_M2416_M984_M987_M990_M991_M992_M995_H1249_H1329_H1578_H1580_H1856_H1964_H1996_H2101_H2102_H2264_H2398_H2463_H2581_H2754_H2760_H3004_H3005_H3033_H3094_H3360_H3361_H3986_M1221_M1292_M1324_M1325_M1545_M1762_M1780_M2006_M2007_M2084_M2085_M2276_M2277_M2323_M2324_H2300_H2375_H2438_H3367_M10…	79	BEI,CAS,EAI	Rv1300	184	198	+	1457120	1457164	11	R->C,11	1457150	1457150:C->T	CDS,7000008460001535,7000008460001536,HemK protein,trans_orient:+,loc_in_cds:580,codon_pos:1,codon:Cgc-Tgc,pep:R->C,Arg-194-Cys,(NSY)	5228	220	100	5008	98.4	1	0.0498	0.0537883
	144904	Rv1769	hypothetical protein Rv1769	Conserved hypotheticals	D->A,10	M1017_M1559_M1782_M1848_H1329_H1856_H1964_H2101_H2581_H3360_M1292_M1545_M1762_M1780_M2006_M2007_M2084_M2085_M2276_M2277_M2323_M2324_H2300_M2131_M2479	25	CAS,BEI	Rv1769	392	404	+	2003806	2003844	10	D->A,10	2003834	2003834:A->C	CDS,7000008460004281,7000008460004283,hypothetical protein,trans_orient:+,loc_in_cds:1202,codon_pos:2,codon:gAc-gCc,pep:D->A,Asp-401-Ala,(NSY)	1938	65	29.5	1873	36.8	0.8	0.0343	0.045816
M2324	154515	Rv2029c	6-phosphofructokinase PfkB	Intermediary metabolism and respiration	L->F,11	M1017_M1559_H1964_H2101_M1292_M1545_M1762_M1780_M2006_M2007_M2276_M2277_M2323_M2324_M2479	15	CAS	Rv2029c	211	230	-	2275743	2275802	11	L->F,11	2275772	2275772:G->A	CDS,7000008460015213,7000008460015214,6-phosphofructokinase PfkB,trans_orient:-,loc_in_cds:661,codon_pos:1,codon:Ctc-Ttc,pep:L->F,Leu-221-Phe,(NSY)	431	38	17.3	393	7.7	2.2	< 0.0001	0.000218421
	155102	Rv2029c	6-phosphofructokinase PfkB	Intermediary metabolism and respiration	L->F,1	M1017_M1559_H1964_H2101_M1292_M1545_M1762_M1780_M2006_M2007_M2276_M2277_M2323_M2324_M2479	15	CAS	Rv2029c	221	240	-	2275713	2275772	1	L->F,1	2275772	2275772:G->A	CDS,7000008460015213,7000008460015214,6-phosphofructokinase PfkB,trans_orient:-,loc_in_cds:661,codon_pos:1,codon:Ctc-Ttc,pep:L->F,Leu-221-Phe,(NSY)	431	38	17.3	393	7.7	2.2	< 0.0001	0.000218421
	155973	Rv1733c	transmembrane protein	Cell wall and cell processes	Q->H,18	M1004_M1007_M1009_M1010_M1012_M1017_M1021_M1022_M1023_M1025_M1271_M1272_M1273_M1533_M1559_M1570_M1782_M1816_M1848_M2416_M984_M987_M990_M991_M992_M995_H1249_H1329_H1578_H1580_H1856_H1964_H1996_H2101_H2102_H2264_H2398_H2463_H2581_H2754_H2760_H3004_H3005_H3033_H3094_H3360_H3361_H3986_M1221_M1292_M1324_M1325_M1545_M1780_M2084_M2085_M2323_M2324_H2300_H2375_H2438_H3367_M1008_M1011_M1024_M1422_M1441_M14…	74	BEI,CAS,EAI	Rv1733c	51	70	-	1960285	1960344	18	Q->H,18	1960291	1960291:C->A	CDS,7000008460014280,7000008460014281,transmembrane protein,trans_orient:-,loc_in_cds:204,codon_pos:3,codon:caG-caT,pep:Q->H,Gln-68-His,(NSY)	4875	219	99.5	4656	91.5	1.1	< 0.0001	0.000218421
	153959	Rv1733c	transmembrane protein	Cell wall and cell processes	Q->H,8	M1004_M1007_M1009_M1010_M1012_M1017_M1021_M1022_M1023_M1025_M1271_M1272_M1273_M1533_M1559_M1570_M1782_M1816_M1848_M2416_M984_M987_M990_M991_M992_M995_H1249_H1329_H1578_H1580_H1856_H1964_H1996_H2101_H2102_H2264_H2398_H2463_H2581_H2754_H2760_H3004_H3005_H3033_H3094_H3360_H3361_H3986_M1221_M1292_M1324_M1325_M1545_M1780_M2084_M2085_M2323_M2324_H2300_H2375_H2438_H3367_M1008_M1011_M1024_M1422_M1441_M14…	74	BEI,CAS,EAI	Rv1733c	61	80	-	1960255	1960314	8	Q->H,8	1960291	1960291:C->A	CDS,7000008460014280,7000008460014281,transmembrane protein,trans_orient:-,loc_in_cds:204,codon_pos:3,codon:caG-caT,pep:Q->H,Gln-68-His,(NSY)	4875	219	99.5	4656	91.5	1.1	< 0.0001	0.000218421
	179016	Rv3616c	ESX-1 secretion-associated protein EspA	Cell wall and cell processes	T->I,12	M1004_M1007_M1009_M1010_M1012_M1017_M1021_M1022_M1023_M1025_M1271_M1272_M1273_M1533_M1559_M1570_M1782_M1816_M1848_M2416_M984_M987_M990_M991_M992_M995_H1249_H1329_H1578_H1580_H1856_H1964_H1996_H2101_H2102_H2264_H2398_H2463_H2581_H2754_H2760_H3004_H3005_H3033_H3094_H3360_H3361_H3986_M1221_M1292_M1324_M1325_M1545_M1762_M1780_M2006_M2007_M2084_M2085_M2276_M2277_M2323_M2324_H2300_H2375_H2438_H3367_M10…	79	BEI,CAS,EAI	Rv3616c	181	195	-	4055970	4056014	12	T->I,12	4055980	4055980:G->A	CDS,7000008460015150,7000008460015151,ESX-1 secretion-associated protein EspA,trans_orient:-,loc_in_cds:575,codon_pos:2,codon:aCc-aTc,pep:T->I,Thr-192-Ile,(NSY)	5227	220	100	5007	98.4	1	0.0499	0.0537883
	67588	Rv0589	Mce family protein Mce2A	Virulence, detoxification and adaptation	F->S,3	M1004_M1007_M1009_M1010_M1012_M1017_M1021_M1022_M1023_M1025_M1271_M1272_M1273_M1533_M1559_M1570_M1782_M1816_M1848_M2416_M984_M987_M990_M991_M992_M995_H1249_H1329_H1578_H1580_H1856_H1964_H1996_H2101_H2102_H2264_H2398_H2463_H2581_H2754_H2760_H3004_H3005_H3033_H3094_H3360_H3361_H3986_M1221_M1292_M1324_M1325_M1545_M1762_M1780_M2006_M2007_M2084_M2085_M2276_M2277_M2323_M2324_H2300_H2375_H2438_H3367_M10…	79	BEI,CAS,EAI	Rv0589	49	64	+	686968	687015	3	F->S,3	686975	686975:T->C	CDS,7000008460001901,7000008460001902,MCE-family protein Mce2A,trans_orient:+,loc_in_cds:152,codon_pos:2,codon:tTc-tCc,pep:F->S,Phe-51-Ser,(NSY)	5222	220	100	5002	98.3	1	0.0519	0.0552269
	178755	Rv1300	release factor glutamine methyltransferase	Intermediary metabolism and respiration	R->C,11	M1004_M1007_M1009_M1010_M1012_M1017_M1021_M1022_M1023_M1025_M1271_M1272_M1273_M1533_M1559_M1570_M1782_M1816_M1848_M2416_M984_M987_M990_M991_M992_M995_H1249_H1329_H1578_H1580_H1856_H1964_H1996_H2101_H2102_H2264_H2398_H2463_H2581_H2754_H2760_H3004_H3005_H3033_H3094_H3360_H3361_H3986_M1221_M1292_M1324_M1325_M1545_M1762_M1780_M2006_M2007_M2084_M2085_M2276_M2277_M2323_M2324_H2300_H2375_H2438_H3367_M10…	79	BEI,CAS,EAI	Rv1300	184	198	+	1457120	1457164	11	R->C,11	1457150	1457150:C->T	CDS,7000008460001535,7000008460001536,HemK protein,trans_orient:+,loc_in_cds:580,codon_pos:1,codon:Cgc-Tgc,pep:R->C,Arg-194-Cys,(NSY)	5228	220	100	5008	98.4	1	0.0498	0.0537883
	144904	Rv1769	hypothetical protein Rv1769	Conserved hypotheticals	D->A,10	M1017_M1559_M1782_M1848_H1329_H1856_H1964_H2101_H2581_H3360_M1292_M1545_M1762_M1780_M2006_M2007_M2084_M2085_M2276_M2277_M2323_M2324_H2300_M2131_M2479	25	CAS,BEI	Rv1769	392	404	+	2003806	2003844	10	D->A,10	2003834	2003834:A->C	CDS,7000008460004281,7000008460004283,hypothetical protein,trans_orient:+,loc_in_cds:1202,codon_pos:2,codon:gAc-gCc,pep:D->A,Asp-401-Ala,(NSY)	1938	65	29.5	1873	36.8	0.8	0.0343	0.045816
M1780	154515	Rv2029c	6-phosphofructokinase PfkB	Intermediary metabolism and respiration	L->F,11	M1017_M1559_H1964_H2101_M1292_M1545_M1762_M1780_M2006_M2007_M2276_M2277_M2323_M2324_M2479	15	CAS	Rv2029c	211	230	-	2275743	2275802	11	L->F,11	2275772	2275772:G->A	CDS,7000008460015213,7000008460015214,6-phosphofructokinase PfkB,trans_orient:-,loc_in_cds:661,codon_pos:1,codon:Ctc-Ttc,pep:L->F,Leu-221-Phe,(NSY)	431	38	17.3	393	7.7	2.2	< 0.0001	0.000218421
	155102	Rv2029c	6-phosphofructokinase PfkB	Intermediary metabolism and respiration	L->F,1	M1017_M1559_H1964_H2101_M1292_M1545_M1762_M1780_M2006_M2007_M2276_M2277_M2323_M2324_M2479	15	CAS	Rv2029c	221	240	-	2275713	2275772	1	L->F,1	2275772	2275772:G->A	CDS,7000008460015213,7000008460015214,6-phosphofructokinase PfkB,trans_orient:-,loc_in_cds:661,codon_pos:1,codon:Ctc-Ttc,pep:L->F,Leu-221-Phe,(NSY)	431	38	17.3	393	7.7	2.2	< 0.0001	0.000218421
	155973	Rv1733c	transmembrane protein	Cell wall and cell processes	Q->H,18	M1004_M1007_M1009_M1010_M1012_M1017_M1021_M1022_M1023_M1025_M1271_M1272_M1273_M1533_M1559_M1570_M1782_M1816_M1848_M2416_M984_M987_M990_M991_M992_M995_H1249_H1329_H1578_H1580_H1856_H1964_H1996_H2101_H2102_H2264_H2398_H2463_H2581_H2754_H2760_H3004_H3005_H3033_H3094_H3360_H3361_H3986_M1221_M1292_M1324_M1325_M1545_M1780_M2084_M2085_M2323_M2324_H2300_H2375_H2438_H3367_M1008_M1011_M1024_M1422_M1441_M14…	74	BEI,CAS,EAI	Rv1733c	51	70	-	1960285	1960344	18	Q->H,18	1960291	1960291:C->A	CDS,7000008460014280,7000008460014281,transmembrane protein,trans_orient:-,loc_in_cds:204,codon_pos:3,codon:caG-caT,pep:Q->H,Gln-68-His,(NSY)	4875	219	99.5	4656	91.5	1.1	< 0.0001	0.000218421
	153959	Rv1733c	transmembrane protein	Cell wall and cell processes	Q->H,8	M1004_M1007_M1009_M1010_M1012_M1017_M1021_M1022_M1023_M1025_M1271_M1272_M1273_M1533_M1559_M1570_M1782_M1816_M1848_M2416_M984_M987_M990_M991_M992_M995_H1249_H1329_H1578_H1580_H1856_H1964_H1996_H2101_H2102_H2264_H2398_H2463_H2581_H2754_H2760_H3004_H3005_H3033_H3094_H3360_H3361_H3986_M1221_M1292_M1324_M1325_M1545_M1780_M2084_M2085_M2323_M2324_H2300_H2375_H2438_H3367_M1008_M1011_M1024_M1422_M1441_M14…	74	BEI,CAS,EAI	Rv1733c	61	80	-	1960255	1960314	8	Q->H,8	1960291	1960291:C->A	CDS,7000008460014280,7000008460014281,transmembrane protein,trans_orient:-,loc_in_cds:204,codon_pos:3,codon:caG-caT,pep:Q->H,Gln-68-His,(NSY)	4875	219	99.5	4656	91.5	1.1	< 0.0001	0.000218421
	179016	Rv3616c	ESX-1 secretion-associated protein EspA	Cell wall and cell processes	T->I,12	M1004_M1007_M1009_M1010_M1012_M1017_M1021_M1022_M1023_M1025_M1271_M1272_M1273_M1533_M1559_M1570_M1782_M1816_M1848_M2416_M984_M987_M990_M991_M992_M995_H1249_H1329_H1578_H1580_H1856_H1964_H1996_H2101_H2102_H2264_H2398_H2463_H2581_H2754_H2760_H3004_H3005_H3033_H3094_H3360_H3361_H3986_M1221_M1292_M1324_M1325_M1545_M1762_M1780_M2006_M2007_M2084_M2085_M2276_M2277_M2323_M2324_H2300_H2375_H2438_H3367_M10…	79	BEI,CAS,EAI	Rv3616c	181	195	-	4055970	4056014	12	T->I,12	4055980	4055980:G->A	CDS,7000008460015150,7000008460015151,ESX-1 secretion-associated protein EspA,trans_orient:-,loc_in_cds:575,codon_pos:2,codon:aCc-aTc,pep:T->I,Thr-192-Ile,(NSY)	5227	220	100	5007	98.4	1	0.0499	0.0537883
	67588	Rv0589	Mce family protein Mce2A	Virulence, detoxification and adaptation	F->S,3	M1004_M1007_M1009_M1010_M1012_M1017_M1021_M1022_M1023_M1025_M1271_M1272_M1273_M1533_M1559_M1570_M1782_M1816_M1848_M2416_M984_M987_M990_M991_M992_M995_H1249_H1329_H1578_H1580_H1856_H1964_H1996_H2101_H2102_H2264_H2398_H2463_H2581_H2754_H2760_H3004_H3005_H3033_H3094_H3360_H3361_H3986_M1221_M1292_M1324_M1325_M1545_M1762_M1780_M2006_M2007_M2084_M2085_M2276_M2277_M2323_M2324_H2300_H2375_H2438_H3367_M10…	79	BEI,CAS,EAI	Rv0589	49	64	+	686968	687015	3	F->S,3	686975	686975:T->C	CDS,7000008460001901,7000008460001902,MCE-family protein Mce2A,trans_orient:+,loc_in_cds:152,codon_pos:2,codon:tTc-tCc,pep:F->S,Phe-51-Ser,(NSY)	5222	220	100	5002	98.3	1	0.0519	0.0552269
	178755	Rv1300	release factor glutamine methyltransferase	Intermediary metabolism and respiration	R->C,11	M1004_M1007_M1009_M1010_M1012_M1017_M1021_M1022_M1023_M1025_M1271_M1272_M1273_M1533_M1559_M1570_M1782_M1816_M1848_M2416_M984_M987_M990_M991_M992_M995_H1249_H1329_H1578_H1580_H1856_H1964_H1996_H2101_H2102_H2264_H2398_H2463_H2581_H2754_H2760_H3004_H3005_H3033_H3094_H3360_H3361_H3986_M1221_M1292_M1324_M1325_M1545_M1762_M1780_M2006_M2007_M2084_M2085_M2276_M2277_M2323_M2324_H2300_H2375_H2438_H3367_M10…	79	BEI,CAS,EAI	Rv1300	184	198	+	1457120	1457164	11	R->C,11	1457150	1457150:C->T	CDS,7000008460001535,7000008460001536,HemK protein,trans_orient:+,loc_in_cds:580,codon_pos:1,codon:Cgc-Tgc,pep:R->C,Arg-194-Cys,(NSY)	5228	220	100	5008	98.4	1	0.0498	0.0537883
	144904	Rv1769	hypothetical protein Rv1769	Conserved hypotheticals	D->A,10	M1017_M1559_M1782_M1848_H1329_H1856_H1964_H2101_H2581_H3360_M1292_M1545_M1762_M1780_M2006_M2007_M2084_M2085_M2276_M2277_M2323_M2324_H2300_M2131_M2479	25	CAS,BEI	Rv1769	392	404	+	2003806	2003844	10	D->A,10	2003834	2003834:A->C	CDS,7000008460004281,7000008460004283,hypothetical protein,trans_orient:+,loc_in_cds:1202,codon_pos:2,codon:gAc-gCc,pep:D->A,Asp-401-Ala,(NSY)	1938	65	29.5	1873	36.8	0.8	0.0343	0.045816
	Red text shows rapidly evolving epitopes
	NOTE: All three strains have 8 identical mutations in the same position of the 6 antigens. Strains M2323, M2324 and M1780 were isolated on 08/2003, 08/2003 and 01/2003, respectively

## Sheet: P103
Strain	epitope	RV_no	Description of protein	FC	positions mutated in epitope	strains	number of strain	Present in lineage	gene	epitope start (protein coords)	epitope stop (protein coords)	gene orient	epitope start (genomic coords)	epitope stop (genomic coords)	mutation position (protein coords within epitope)	mutation considered	mutation position (genomic coords)	mutation point in genome	description	Total # strains with this mutation	# strains from India with this mutation	% strains from india with this mutation	# strains from the rest of the world with this mutation	% strains from rest of world with this mutation	% strains from india / % strains from rest of world with this mutation	p-value Fischers Exact test	adjusted p values(BH)
M1848	155973	Rv1733c	transmembrane protein	Cell wall and cell processes	Q->H,18	M1004_M1007_M1009_M1010_M1012_M1017_M1021_M1022_M1023_M1025_M1271_M1272_M1273_M1533_M1559_M1570_M1782_M1816_M1848_M2416_M984_M987_M990_M991_M992_M995_H1249_H1329_H1578_H1580_H1856_H1964_H1996_H2101_H2102_H2264_H2398_H2463_H2581_H2754_H2760_H3004_H3005_H3033_H3094_H3360_H3361_H3986_M1221_M1292_M1324_M1325_M1545_M1780_M2084_M2085_M2323_M2324_H2300_H2375_H2438_H3367_M1008_M1011_M1024_M1422_M1441_M14…	74	BEI,CAS,EAI	Rv1733c	51	70	-	1960285	1960344	18	Q->H,18	1960291	1960291:C->A	CDS,7000008460014280,7000008460014281,transmembrane protein,trans_orient:-,loc_in_cds:204,codon_pos:3,codon:caG-caT,pep:Q->H,Gln-68-His,(NSY)	4875	219	99.5	4656	91.5	1.1	< 0.0001	0.000218421
	153959	Rv1733c	transmembrane protein	Cell wall and cell processes	Q->H,8	M1004_M1007_M1009_M1010_M1012_M1017_M1021_M1022_M1023_M1025_M1271_M1272_M1273_M1533_M1559_M1570_M1782_M1816_M1848_M2416_M984_M987_M990_M991_M992_M995_H1249_H1329_H1578_H1580_H1856_H1964_H1996_H2101_H2102_H2264_H2398_H2463_H2581_H2754_H2760_H3004_H3005_H3033_H3094_H3360_H3361_H3986_M1221_M1292_M1324_M1325_M1545_M1780_M2084_M2085_M2323_M2324_H2300_H2375_H2438_H3367_M1008_M1011_M1024_M1422_M1441_M14…	74	BEI,CAS,EAI	Rv1733c	61	80	-	1960255	1960314	8	Q->H,8	1960291	1960291:C->A	CDS,7000008460014280,7000008460014281,transmembrane protein,trans_orient:-,loc_in_cds:204,codon_pos:3,codon:caG-caT,pep:Q->H,Gln-68-His,(NSY)	4875	219	99.5	4656	91.5	1.1	< 0.0001	0.000218421
	179016	Rv3616c	ESX-1 secretion-associated protein EspA	Cell wall and cell processes	T->I,12	M1004_M1007_M1009_M1010_M1012_M1017_M1021_M1022_M1023_M1025_M1271_M1272_M1273_M1533_M1559_M1570_M1782_M1816_M1848_M2416_M984_M987_M990_M991_M992_M995_H1249_H1329_H1578_H1580_H1856_H1964_H1996_H2101_H2102_H2264_H2398_H2463_H2581_H2754_H2760_H3004_H3005_H3033_H3094_H3360_H3361_H3986_M1221_M1292_M1324_M1325_M1545_M1762_M1780_M2006_M2007_M2084_M2085_M2276_M2277_M2323_M2324_H2300_H2375_H2438_H3367_M10…	79	BEI,CAS,EAI	Rv3616c	181	195	-	4055970	4056014	12	T->I,12	4055980	4055980:G->A	CDS,7000008460015150,7000008460015151,ESX-1 secretion-associated protein EspA,trans_orient:-,loc_in_cds:575,codon_pos:2,codon:aCc-aTc,pep:T->I,Thr-192-Ile,(NSY)	5227	220	100	5007	98.4	1	0.0499	0.0537883		mTCE in equal proportion in India and outside India (8/66=12.1%)
	67588	Rv0589	Mce family protein Mce2A	Virulence, detoxification and adaptation	F->S,3	M1004_M1007_M1009_M1010_M1012_M1017_M1021_M1022_M1023_M1025_M1271_M1272_M1273_M1533_M1559_M1570_M1782_M1816_M1848_M2416_M984_M987_M990_M991_M992_M995_H1249_H1329_H1578_H1580_H1856_H1964_H1996_H2101_H2102_H2264_H2398_H2463_H2581_H2754_H2760_H3004_H3005_H3033_H3094_H3360_H3361_H3986_M1221_M1292_M1324_M1325_M1545_M1762_M1780_M2006_M2007_M2084_M2085_M2276_M2277_M2323_M2324_H2300_H2375_H2438_H3367_M10…	79	BEI,CAS,EAI	Rv0589	49	64	+	686968	687015	3	F->S,3	686975	686975:T->C	CDS,7000008460001901,7000008460001902,MCE-family protein Mce2A,trans_orient:+,loc_in_cds:152,codon_pos:2,codon:tTc-tCc,pep:F->S,Phe-51-Ser,(NSY)	5222	220	100	5002	98.3	1	0.0519	0.0552269
	178755	Rv1300	release factor glutamine methyltransferase	Intermediary metabolism and respiration	R->C,11	M1004_M1007_M1009_M1010_M1012_M1017_M1021_M1022_M1023_M1025_M1271_M1272_M1273_M1533_M1559_M1570_M1782_M1816_M1848_M2416_M984_M987_M990_M991_M992_M995_H1249_H1329_H1578_H1580_H1856_H1964_H1996_H2101_H2102_H2264_H2398_H2463_H2581_H2754_H2760_H3004_H3005_H3033_H3094_H3360_H3361_H3986_M1221_M1292_M1324_M1325_M1545_M1762_M1780_M2006_M2007_M2084_M2085_M2276_M2277_M2323_M2324_H2300_H2375_H2438_H3367_M10…	79	BEI,CAS,EAI	Rv1300	184	198	+	1457120	1457164	11	R->C,11	1457150	1457150:C->T	CDS,7000008460001535,7000008460001536,HemK protein,trans_orient:+,loc_in_cds:580,codon_pos:1,codon:Cgc-Tgc,pep:R->C,Arg-194-Cys,(NSY)	5228	220	100	5008	98.4	1	0.0498	0.0537883
	144904	Rv1769	hypothetical protein Rv1769	Conserved hypotheticals	D->A,10	M1017_M1559_M1782_M1848_H1329_H1856_H1964_H2101_H2581_H3360_M1292_M1545_M1762_M1780_M2006_M2007_M2084_M2085_M2276_M2277_M2323_M2324_H2300_M2131_M2479	25	CAS,BEI	Rv1769	392	404	+	2003806	2003844	10	D->A,10	2003834	2003834:A->C	CDS,7000008460004281,7000008460004283,hypothetical protein,trans_orient:+,loc_in_cds:1202,codon_pos:2,codon:gAc-gCc,pep:D->A,Asp-401-Ala,(NSY)	1938	65	29.5	1873	36.8	0.8	0.0343	0.045816
	144920	Rv3879c	ESX-1 secretion-associated protein EspK	Cell wall and cell processes	E->A,4	M1848_H1329_H1856_H2581_H3360_M2084_M2085_H2300_M2131	9	BEI	Rv3879c	657	672	-	4357945	4357992	4	E->A,4	4357982	4357982:T->G	CDS,7000008460012153,7000008460012154,ESX-1 secretion-associated protein EspK,trans_orient:-,loc_in_cds:1979,codon_pos:2,codon:gAg-gCg,pep:E->A,Glu-660-Ala,(NSY)	1505	27	12.3	1478	29	0.4	< 0.0001	0.000218421
	178814	Rv0529	cytochrome C-type biogenesis protein CcsA	Intermediary metabolism and respiration	I->M,4	M1782_M1848_H1856_H2581_H3360_M2084_M2085_H2300_M2131	9	BEI	Rv0529	242	256	+	620617	620661	4	I->M,4	620628	620628:A->G	CDS,7000008460013284,7000008460013285,cytochrome C-type biogenesis protein CcsA,trans_orient:+,loc_in_cds:735,codon_pos:3,codon:atA-atG,pep:I->M,Ile-245-Met,(NSY)	1328	24	10.9	1304	25.6	0.4	< 0.0001	0.000218421
	110831	Rv3407	antitoxin VapB47	Virulence, detoxification and adaptation	R->C,6	M1782_M1848_H1856_H2581_H3360_M2084_M2085_H2300_M2131	9	BEI	Rv3407	79	93	+	3826666	3826710	6	R->C,6	3826681	3826681:C->T	CDS,7000008460011889,7000008460011890,antitoxin VapB47,trans_orient:+,loc_in_cds:250,codon_pos:1,codon:Cgc-Tgc,pep:R->C,Arg-84-Cys,(NSY)	1283	24	10.9	1259	24.7	0.4	< 0.0001	0.000218421		mTCE enriched outside India (4/66) =6.1%
	111006	Rv3407	antitoxin VapB47	Virulence, detoxification and adaptation	R->C,3	M1782_M1848_H1856_H2581_H3360_M2084_M2085_H2300_M2131	9	BEI	Rv3407	82	96	+	3826675	3826719	3	R->C,3	3826681	3826681:C->T	CDS,7000008460011889,7000008460011890,antitoxin VapB47,trans_orient:+,loc_in_cds:250,codon_pos:1,codon:Cgc-Tgc,pep:R->C,Arg-84-Cys,(NSY)	1283	24	10.9	1259	24.7	0.4	< 0.0001	0.000218421
M2131	155973	Rv1733c	transmembrane protein	Cell wall and cell processes	Q->H,18	M1004_M1007_M1009_M1010_M1012_M1017_M1021_M1022_M1023_M1025_M1271_M1272_M1273_M1533_M1559_M1570_M1782_M1816_M1848_M2416_M984_M987_M990_M991_M992_M995_H1249_H1329_H1578_H1580_H1856_H1964_H1996_H2101_H2102_H2264_H2398_H2463_H2581_H2754_H2760_H3004_H3005_H3033_H3094_H3360_H3361_H3986_M1221_M1292_M1324_M1325_M1545_M1780_M2084_M2085_M2323_M2324_H2300_H2375_H2438_H3367_M1008_M1011_M1024_M1422_M1441_M14…	74	BEI,CAS,EAI	Rv1733c	51	70	-	1960285	1960344	18	Q->H,18	1960291	1960291:C->A	CDS,7000008460014280,7000008460014281,transmembrane protein,trans_orient:-,loc_in_cds:204,codon_pos:3,codon:caG-caT,pep:Q->H,Gln-68-His,(NSY)	4875	219	99.5	4656	91.5	1.1	< 0.0001	0.000218421
	153959	Rv1733c	transmembrane protein	Cell wall and cell processes	Q->H,8	M1004_M1007_M1009_M1010_M1012_M1017_M1021_M1022_M1023_M1025_M1271_M1272_M1273_M1533_M1559_M1570_M1782_M1816_M1848_M2416_M984_M987_M990_M991_M992_M995_H1249_H1329_H1578_H1580_H1856_H1964_H1996_H2101_H2102_H2264_H2398_H2463_H2581_H2754_H2760_H3004_H3005_H3033_H3094_H3360_H3361_H3986_M1221_M1292_M1324_M1325_M1545_M1780_M2084_M2085_M2323_M2324_H2300_H2375_H2438_H3367_M1008_M1011_M1024_M1422_M1441_M14…	74	BEI,CAS,EAI	Rv1733c	61	80	-	1960255	1960314	8	Q->H,8	1960291	1960291:C->A	CDS,7000008460014280,7000008460014281,transmembrane protein,trans_orient:-,loc_in_cds:204,codon_pos:3,codon:caG-caT,pep:Q->H,Gln-68-His,(NSY)	4875	219	99.5	4656	91.5	1.1	< 0.0001	0.000218421
	179016	Rv3616c	ESX-1 secretion-associated protein EspA	Cell wall and cell processes	T->I,12	M1004_M1007_M1009_M1010_M1012_M1017_M1021_M1022_M1023_M1025_M1271_M1272_M1273_M1533_M1559_M1570_M1782_M1816_M1848_M2416_M984_M987_M990_M991_M992_M995_H1249_H1329_H1578_H1580_H1856_H1964_H1996_H2101_H2102_H2264_H2398_H2463_H2581_H2754_H2760_H3004_H3005_H3033_H3094_H3360_H3361_H3986_M1221_M1292_M1324_M1325_M1545_M1762_M1780_M2006_M2007_M2084_M2085_M2276_M2277_M2323_M2324_H2300_H2375_H2438_H3367_M10…	79	BEI,CAS,EAI	Rv3616c	181	195	-	4055970	4056014	12	T->I,12	4055980	4055980:G->A	CDS,7000008460015150,7000008460015151,ESX-1 secretion-associated protein EspA,trans_orient:-,loc_in_cds:575,codon_pos:2,codon:aCc-aTc,pep:T->I,Thr-192-Ile,(NSY)	5227	220	100	5007	98.4	1	0.0499	0.0537883		mTCE in equal proportion in India and outside India (8/66=12.1%)
	67588	Rv0589	Mce family protein Mce2A	Virulence, detoxification and adaptation	F->S,3	M1004_M1007_M1009_M1010_M1012_M1017_M1021_M1022_M1023_M1025_M1271_M1272_M1273_M1533_M1559_M1570_M1782_M1816_M1848_M2416_M984_M987_M990_M991_M992_M995_H1249_H1329_H1578_H1580_H1856_H1964_H1996_H2101_H2102_H2264_H2398_H2463_H2581_H2754_H2760_H3004_H3005_H3033_H3094_H3360_H3361_H3986_M1221_M1292_M1324_M1325_M1545_M1762_M1780_M2006_M2007_M2084_M2085_M2276_M2277_M2323_M2324_H2300_H2375_H2438_H3367_M10…	79	BEI,CAS,EAI	Rv0589	49	64	+	686968	687015	3	F->S,3	686975	686975:T->C	CDS,7000008460001901,7000008460001902,MCE-family protein Mce2A,trans_orient:+,loc_in_cds:152,codon_pos:2,codon:tTc-tCc,pep:F->S,Phe-51-Ser,(NSY)	5222	220	100	5002	98.3	1	0.0519	0.0552269
	178755	Rv1300	release factor glutamine methyltransferase	Intermediary metabolism and respiration	R->C,11	M1004_M1007_M1009_M1010_M1012_M1017_M1021_M1022_M1023_M1025_M1271_M1272_M1273_M1533_M1559_M1570_M1782_M1816_M1848_M2416_M984_M987_M990_M991_M992_M995_H1249_H1329_H1578_H1580_H1856_H1964_H1996_H2101_H2102_H2264_H2398_H2463_H2581_H2754_H2760_H3004_H3005_H3033_H3094_H3360_H3361_H3986_M1221_M1292_M1324_M1325_M1545_M1762_M1780_M2006_M2007_M2084_M2085_M2276_M2277_M2323_M2324_H2300_H2375_H2438_H3367_M10…	79	BEI,CAS,EAI	Rv1300	184	198	+	1457120	1457164	11	R->C,11	1457150	1457150:C->T	CDS,7000008460001535,7000008460001536,HemK protein,trans_orient:+,loc_in_cds:580,codon_pos:1,codon:Cgc-Tgc,pep:R->C,Arg-194-Cys,(NSY)	5228	220	100	5008	98.4	1	0.0498	0.0537883
	144904	Rv1769	hypothetical protein Rv1769	Conserved hypotheticals	D->A,10	M1017_M1559_M1782_M1848_H1329_H1856_H1964_H2101_H2581_H3360_M1292_M1545_M1762_M1780_M2006_M2007_M2084_M2085_M2276_M2277_M2323_M2324_H2300_M2131_M2479	25	CAS,BEI	Rv1769	392	404	+	2003806	2003844	10	D->A,10	2003834	2003834:A->C	CDS,7000008460004281,7000008460004283,hypothetical protein,trans_orient:+,loc_in_cds:1202,codon_pos:2,codon:gAc-gCc,pep:D->A,Asp-401-Ala,(NSY)	1938	65	29.5	1873	36.8	0.8	0.0343	0.045816
	144920	Rv3879c	ESX-1 secretion-associated protein EspK	Cell wall and cell processes	E->A,4	M1848_H1329_H1856_H2581_H3360_M2084_M2085_H2300_M2131	9	BEI	Rv3879c	657	672	-	4357945	4357992	4	E->A,4	4357982	4357982:T->G	CDS,7000008460012153,7000008460012154,ESX-1 secretion-associated protein EspK,trans_orient:-,loc_in_cds:1979,codon_pos:2,codon:gAg-gCg,pep:E->A,Glu-660-Ala,(NSY)	1505	27	12.3	1478	29	0.4	< 0.0001	0.000218421
	178814	Rv0529	cytochrome C-type biogenesis protein CcsA	Intermediary metabolism and respiration	I->M,4	M1782_M1848_H1856_H2581_H3360_M2084_M2085_H2300_M2131	9	BEI	Rv0529	242	256	+	620617	620661	4	I->M,4	620628	620628:A->G	CDS,7000008460013284,7000008460013285,cytochrome C-type biogenesis protein CcsA,trans_orient:+,loc_in_cds:735,codon_pos:3,codon:atA-atG,pep:I->M,Ile-245-Met,(NSY)	1328	24	10.9	1304	25.6	0.4	< 0.0001	0.000218421
	110831	Rv3407	antitoxin VapB47	Virulence, detoxification and adaptation	R->C,6	M1782_M1848_H1856_H2581_H3360_M2084_M2085_H2300_M2131	9	BEI	Rv3407	79	93	+	3826666	3826710	6	R->C,6	3826681	3826681:C->T	CDS,7000008460011889,7000008460011890,antitoxin VapB47,trans_orient:+,loc_in_cds:250,codon_pos:1,codon:Cgc-Tgc,pep:R->C,Arg-84-Cys,(NSY)	1283	24	10.9	1259	24.7	0.4	< 0.0001	0.000218421		mTCE enriched outside India (4/66) =6.1%
	111006	Rv3407	antitoxin VapB47	Virulence, detoxification and adaptation	R->C,3	M1782_M1848_H1856_H2581_H3360_M2084_M2085_H2300_M2131	9	BEI	Rv3407	82	96	+	3826675	3826719	3	R->C,3	3826681	3826681:C->T	CDS,7000008460011889,7000008460011890,antitoxin VapB47,trans_orient:+,loc_in_cds:250,codon_pos:1,codon:Cgc-Tgc,pep:R->C,Arg-84-Cys,(NSY)	1283	24	10.9	1259	24.7	0.4	< 0.0001	0.000218421
	Red text shows rapidly evolving epitopes
	NOTE: All two strains have 10 identical mutations in the same position of the 8 antigens. Strains M1848 and M2131 were isolated on 02/2003 and 07/2003, respectively.

## Sheet: P106
Strains	epitope	RV_no	Description of protein	FC	positions mutated in epitope	strains	number of strain	Present in lineage	gene	epitope start (protein coords)	epitope stop (protein coords)	gene orient	epitope start (genomic coords)	epitope stop (genomic coords)	mutation position (protein coords within epitope)	mutation considered	mutation position (genomic coords)	mutation point in genome	description	Total # strains with this mutation	# strains from India with this mutation	% strains from india with this mutation	# strains from the rest of the world with this mutation	% strains from rest of world with this mutation	% strains from india / % strains from rest of world with this mutation	p-value Fischers Exact test	adjusted p values(BH)
M2084	155973	Rv1733c	transmembrane protein	Cell wall and cell processes	Q->H,18	M1004_M1007_M1009_M1010_M1012_M1017_M1021_M1022_M1023_M1025_M1271_M1272_M1273_M1533_M1559_M1570_M1782_M1816_M1848_M2416_M984_M987_M990_M991_M992_M995_H1249_H1329_H1578_H1580_H1856_H1964_H1996_H2101_H2102_H2264_H2398_H2463_H2581_H2754_H2760_H3004_H3005_H3033_H3094_H3360_H3361_H3986_M1221_M1292_M1324_M1325_M1545_M1780_M2084_M2085_M2323_M2324_H2300_H2375_H2438_H3367_M1008_M1011_M1024_M1422_M1441_M14…	74	BEI,CAS,EAI	Rv1733c	51	70	-	1960285	1960344	18	Q->H,18	1960291	1960291:C->A	CDS,7000008460014280,7000008460014281,transmembrane protein,trans_orient:-,loc_in_cds:204,codon_pos:3,codon:caG-caT,pep:Q->H,Gln-68-His,(NSY)	4875	219	99.5	4656	91.5	1.1	< 0.0001	0.000218421
	153959	Rv1733c	transmembrane protein	Cell wall and cell processes	Q->H,8	M1004_M1007_M1009_M1010_M1012_M1017_M1021_M1022_M1023_M1025_M1271_M1272_M1273_M1533_M1559_M1570_M1782_M1816_M1848_M2416_M984_M987_M990_M991_M992_M995_H1249_H1329_H1578_H1580_H1856_H1964_H1996_H2101_H2102_H2264_H2398_H2463_H2581_H2754_H2760_H3004_H3005_H3033_H3094_H3360_H3361_H3986_M1221_M1292_M1324_M1325_M1545_M1780_M2084_M2085_M2323_M2324_H2300_H2375_H2438_H3367_M1008_M1011_M1024_M1422_M1441_M14…	74	BEI,CAS,EAI	Rv1733c	61	80	-	1960255	1960314	8	Q->H,8	1960291	1960291:C->A	CDS,7000008460014280,7000008460014281,transmembrane protein,trans_orient:-,loc_in_cds:204,codon_pos:3,codon:caG-caT,pep:Q->H,Gln-68-His,(NSY)	4875	219	99.5	4656	91.5	1.1	< 0.0001	0.000218421
	179016	Rv3616c	ESX-1 secretion-associated protein EspA	Cell wall and cell processes	T->I,12	M1004_M1007_M1009_M1010_M1012_M1017_M1021_M1022_M1023_M1025_M1271_M1272_M1273_M1533_M1559_M1570_M1782_M1816_M1848_M2416_M984_M987_M990_M991_M992_M995_H1249_H1329_H1578_H1580_H1856_H1964_H1996_H2101_H2102_H2264_H2398_H2463_H2581_H2754_H2760_H3004_H3005_H3033_H3094_H3360_H3361_H3986_M1221_M1292_M1324_M1325_M1545_M1762_M1780_M2006_M2007_M2084_M2085_M2276_M2277_M2323_M2324_H2300_H2375_H2438_H3367_M10…	79	BEI,CAS,EAI	Rv3616c	181	195	-	4055970	4056014	12	T->I,12	4055980	4055980:G->A	CDS,7000008460015150,7000008460015151,ESX-1 secretion-associated protein EspA,trans_orient:-,loc_in_cds:575,codon_pos:2,codon:aCc-aTc,pep:T->I,Thr-192-Ile,(NSY)	5227	220	100	5007	98.4	1	0.0499	0.0537883		mTCE in equal proportion in India and outside India (8/66=12.1%)
	67588	Rv0589	Mce family protein Mce2A	Virulence, detoxification and adaptation	F->S,3	M1004_M1007_M1009_M1010_M1012_M1017_M1021_M1022_M1023_M1025_M1271_M1272_M1273_M1533_M1559_M1570_M1782_M1816_M1848_M2416_M984_M987_M990_M991_M992_M995_H1249_H1329_H1578_H1580_H1856_H1964_H1996_H2101_H2102_H2264_H2398_H2463_H2581_H2754_H2760_H3004_H3005_H3033_H3094_H3360_H3361_H3986_M1221_M1292_M1324_M1325_M1545_M1762_M1780_M2006_M2007_M2084_M2085_M2276_M2277_M2323_M2324_H2300_H2375_H2438_H3367_M10…	79	BEI,CAS,EAI	Rv0589	49	64	+	686968	687015	3	F->S,3	686975	686975:T->C	CDS,7000008460001901,7000008460001902,MCE-family protein Mce2A,trans_orient:+,loc_in_cds:152,codon_pos:2,codon:tTc-tCc,pep:F->S,Phe-51-Ser,(NSY)	5222	220	100	5002	98.3	1	0.0519	0.0552269
	178755	Rv1300	release factor glutamine methyltransferase	Intermediary metabolism and respiration	R->C,11	M1004_M1007_M1009_M1010_M1012_M1017_M1021_M1022_M1023_M1025_M1271_M1272_M1273_M1533_M1559_M1570_M1782_M1816_M1848_M2416_M984_M987_M990_M991_M992_M995_H1249_H1329_H1578_H1580_H1856_H1964_H1996_H2101_H2102_H2264_H2398_H2463_H2581_H2754_H2760_H3004_H3005_H3033_H3094_H3360_H3361_H3986_M1221_M1292_M1324_M1325_M1545_M1762_M1780_M2006_M2007_M2084_M2085_M2276_M2277_M2323_M2324_H2300_H2375_H2438_H3367_M10…	79	BEI,CAS,EAI	Rv1300	184	198	+	1457120	1457164	11	R->C,11	1457150	1457150:C->T	CDS,7000008460001535,7000008460001536,HemK protein,trans_orient:+,loc_in_cds:580,codon_pos:1,codon:Cgc-Tgc,pep:R->C,Arg-194-Cys,(NSY)	5228	220	100	5008	98.4	1	0.0498	0.0537883
	144904	Rv1769	hypothetical protein Rv1769	Conserved hypotheticals	D->A,10	M1017_M1559_M1782_M1848_H1329_H1856_H1964_H2101_H2581_H3360_M1292_M1545_M1762_M1780_M2006_M2007_M2084_M2085_M2276_M2277_M2323_M2324_H2300_M2131_M2479	25	CAS,BEI	Rv1769	392	404	+	2003806	2003844	10	D->A,10	2003834	2003834:A->C	CDS,7000008460004281,7000008460004283,hypothetical protein,trans_orient:+,loc_in_cds:1202,codon_pos:2,codon:gAc-gCc,pep:D->A,Asp-401-Ala,(NSY)	1938	65	29.5	1873	36.8	0.8	0.0343	0.045816
	144920	Rv3879c	ESX-1 secretion-associated protein EspK	Cell wall and cell processes	E->A,4	M1848_H1329_H1856_H2581_H3360_M2084_M2085_H2300_M2131	9	BEI	Rv3879c	657	672	-	4357945	4357992	4	E->A,4	4357982	4357982:T->G	CDS,7000008460012153,7000008460012154,ESX-1 secretion-associated protein EspK,trans_orient:-,loc_in_cds:1979,codon_pos:2,codon:gAg-gCg,pep:E->A,Glu-660-Ala,(NSY)	1505	27	12.3	1478	29	0.4	< 0.0001	0.000218421
	178814	Rv0529	cytochrome C-type biogenesis protein CcsA	Intermediary metabolism and respiration	I->M,4	M1782_M1848_H1856_H2581_H3360_M2084_M2085_H2300_M2131	9	BEI	Rv0529	242	256	+	620617	620661	4	I->M,4	620628	620628:A->G	CDS,7000008460013284,7000008460013285,cytochrome C-type biogenesis protein CcsA,trans_orient:+,loc_in_cds:735,codon_pos:3,codon:atA-atG,pep:I->M,Ile-245-Met,(NSY)	1328	24	10.9	1304	25.6	0.4	< 0.0001	0.000218421
	110831	Rv3407	antitoxin VapB47	Virulence, detoxification and adaptation	R->C,6	M1782_M1848_H1856_H2581_H3360_M2084_M2085_H2300_M2131	9	BEI	Rv3407	79	93	+	3826666	3826710	6	R->C,6	3826681	3826681:C->T	CDS,7000008460011889,7000008460011890,antitoxin VapB47,trans_orient:+,loc_in_cds:250,codon_pos:1,codon:Cgc-Tgc,pep:R->C,Arg-84-Cys,(NSY)	1283	24	10.9	1259	24.7	0.4	< 0.0001	0.000218421		mTCE enriched outside India (4/66) =6.1%
	111006	Rv3407	antitoxin VapB47	Virulence, detoxification and adaptation	R->C,3	M1782_M1848_H1856_H2581_H3360_M2084_M2085_H2300_M2131	9	BEI	Rv3407	82	96	+	3826675	3826719	3	R->C,3	3826681	3826681:C->T	CDS,7000008460011889,7000008460011890,antitoxin VapB47,trans_orient:+,loc_in_cds:250,codon_pos:1,codon:Cgc-Tgc,pep:R->C,Arg-84-Cys,(NSY)	1283	24	10.9	1259	24.7	0.4	< 0.0001	0.000218421
M2085	155973	Rv1733c	transmembrane protein	Cell wall and cell processes	Q->H,18	M1004_M1007_M1009_M1010_M1012_M1017_M1021_M1022_M1023_M1025_M1271_M1272_M1273_M1533_M1559_M1570_M1782_M1816_M1848_M2416_M984_M987_M990_M991_M992_M995_H1249_H1329_H1578_H1580_H1856_H1964_H1996_H2101_H2102_H2264_H2398_H2463_H2581_H2754_H2760_H3004_H3005_H3033_H3094_H3360_H3361_H3986_M1221_M1292_M1324_M1325_M1545_M1780_M2084_M2085_M2323_M2324_H2300_H2375_H2438_H3367_M1008_M1011_M1024_M1422_M1441_M14…	74	BEI,CAS,EAI	Rv1733c	51	70	-	1960285	1960344	18	Q->H,18	1960291	1960291:C->A	CDS,7000008460014280,7000008460014281,transmembrane protein,trans_orient:-,loc_in_cds:204,codon_pos:3,codon:caG-caT,pep:Q->H,Gln-68-His,(NSY)	4875	219	99.5	4656	91.5	1.1	< 0.0001	0.000218421
	153959	Rv1733c	transmembrane protein	Cell wall and cell processes	Q->H,8	M1004_M1007_M1009_M1010_M1012_M1017_M1021_M1022_M1023_M1025_M1271_M1272_M1273_M1533_M1559_M1570_M1782_M1816_M1848_M2416_M984_M987_M990_M991_M992_M995_H1249_H1329_H1578_H1580_H1856_H1964_H1996_H2101_H2102_H2264_H2398_H2463_H2581_H2754_H2760_H3004_H3005_H3033_H3094_H3360_H3361_H3986_M1221_M1292_M1324_M1325_M1545_M1780_M2084_M2085_M2323_M2324_H2300_H2375_H2438_H3367_M1008_M1011_M1024_M1422_M1441_M14…	74	BEI,CAS,EAI	Rv1733c	61	80	-	1960255	1960314	8	Q->H,8	1960291	1960291:C->A	CDS,7000008460014280,7000008460014281,transmembrane protein,trans_orient:-,loc_in_cds:204,codon_pos:3,codon:caG-caT,pep:Q->H,Gln-68-His,(NSY)	4875	219	99.5	4656	91.5	1.1	< 0.0001	0.000218421
	179016	Rv3616c	ESX-1 secretion-associated protein EspA	Cell wall and cell processes	T->I,12	M1004_M1007_M1009_M1010_M1012_M1017_M1021_M1022_M1023_M1025_M1271_M1272_M1273_M1533_M1559_M1570_M1782_M1816_M1848_M2416_M984_M987_M990_M991_M992_M995_H1249_H1329_H1578_H1580_H1856_H1964_H1996_H2101_H2102_H2264_H2398_H2463_H2581_H2754_H2760_H3004_H3005_H3033_H3094_H3360_H3361_H3986_M1221_M1292_M1324_M1325_M1545_M1762_M1780_M2006_M2007_M2084_M2085_M2276_M2277_M2323_M2324_H2300_H2375_H2438_H3367_M10…	79	BEI,CAS,EAI	Rv3616c	181	195	-	4055970	4056014	12	T->I,12	4055980	4055980:G->A	CDS,7000008460015150,7000008460015151,ESX-1 secretion-associated protein EspA,trans_orient:-,loc_in_cds:575,codon_pos:2,codon:aCc-aTc,pep:T->I,Thr-192-Ile,(NSY)	5227	220	100	5007	98.4	1	0.0499	0.0537883		mTCE in equal proportion in India and outside India (8/66=12.1%)
	67588	Rv0589	Mce family protein Mce2A	Virulence, detoxification and adaptation	F->S,3	M1004_M1007_M1009_M1010_M1012_M1017_M1021_M1022_M1023_M1025_M1271_M1272_M1273_M1533_M1559_M1570_M1782_M1816_M1848_M2416_M984_M987_M990_M991_M992_M995_H1249_H1329_H1578_H1580_H1856_H1964_H1996_H2101_H2102_H2264_H2398_H2463_H2581_H2754_H2760_H3004_H3005_H3033_H3094_H3360_H3361_H3986_M1221_M1292_M1324_M1325_M1545_M1762_M1780_M2006_M2007_M2084_M2085_M2276_M2277_M2323_M2324_H2300_H2375_H2438_H3367_M10…	79	BEI,CAS,EAI	Rv0589	49	64	+	686968	687015	3	F->S,3	686975	686975:T->C	CDS,7000008460001901,7000008460001902,MCE-family protein Mce2A,trans_orient:+,loc_in_cds:152,codon_pos:2,codon:tTc-tCc,pep:F->S,Phe-51-Ser,(NSY)	5222	220	100	5002	98.3	1	0.0519	0.0552269
	178755	Rv1300	release factor glutamine methyltransferase	Intermediary metabolism and respiration	R->C,11	M1004_M1007_M1009_M1010_M1012_M1017_M1021_M1022_M1023_M1025_M1271_M1272_M1273_M1533_M1559_M1570_M1782_M1816_M1848_M2416_M984_M987_M990_M991_M992_M995_H1249_H1329_H1578_H1580_H1856_H1964_H1996_H2101_H2102_H2264_H2398_H2463_H2581_H2754_H2760_H3004_H3005_H3033_H3094_H3360_H3361_H3986_M1221_M1292_M1324_M1325_M1545_M1762_M1780_M2006_M2007_M2084_M2085_M2276_M2277_M2323_M2324_H2300_H2375_H2438_H3367_M10…	79	BEI,CAS,EAI	Rv1300	184	198	+	1457120	1457164	11	R->C,11	1457150	1457150:C->T	CDS,7000008460001535,7000008460001536,HemK protein,trans_orient:+,loc_in_cds:580,codon_pos:1,codon:Cgc-Tgc,pep:R->C,Arg-194-Cys,(NSY)	5228	220	100	5008	98.4	1	0.0498	0.0537883
	144904	Rv1769	hypothetical protein Rv1769	Conserved hypotheticals	D->A,10	M1017_M1559_M1782_M1848_H1329_H1856_H1964_H2101_H2581_H3360_M1292_M1545_M1762_M1780_M2006_M2007_M2084_M2085_M2276_M2277_M2323_M2324_H2300_M2131_M2479	25	CAS,BEI	Rv1769	392	404	+	2003806	2003844	10	D->A,10	2003834	2003834:A->C	CDS,7000008460004281,7000008460004283,hypothetical protein,trans_orient:+,loc_in_cds:1202,codon_pos:2,codon:gAc-gCc,pep:D->A,Asp-401-Ala,(NSY)	1938	65	29.5	1873	36.8	0.8	0.0343	0.045816
	144920	Rv3879c	ESX-1 secretion-associated protein EspK	Cell wall and cell processes	E->A,4	M1848_H1329_H1856_H2581_H3360_M2084_M2085_H2300_M2131	9	BEI	Rv3879c	657	672	-	4357945	4357992	4	E->A,4	4357982	4357982:T->G	CDS,7000008460012153,7000008460012154,ESX-1 secretion-associated protein EspK,trans_orient:-,loc_in_cds:1979,codon_pos:2,codon:gAg-gCg,pep:E->A,Glu-660-Ala,(NSY)	1505	27	12.3	1478	29	0.4	< 0.0001	0.000218421
	178814	Rv0529	cytochrome C-type biogenesis protein CcsA	Intermediary metabolism and respiration	I->M,4	M1782_M1848_H1856_H2581_H3360_M2084_M2085_H2300_M2131	9	BEI	Rv0529	242	256	+	620617	620661	4	I->M,4	620628	620628:A->G	CDS,7000008460013284,7000008460013285,cytochrome C-type biogenesis protein CcsA,trans_orient:+,loc_in_cds:735,codon_pos:3,codon:atA-atG,pep:I->M,Ile-245-Met,(NSY)	1328	24	10.9	1304	25.6	0.4	< 0.0001	0.000218421
	110831	Rv3407	antitoxin VapB47	Virulence, detoxification and adaptation	R->C,6	M1782_M1848_H1856_H2581_H3360_M2084_M2085_H2300_M2131	9	BEI	Rv3407	79	93	+	3826666	3826710	6	R->C,6	3826681	3826681:C->T	CDS,7000008460011889,7000008460011890,antitoxin VapB47,trans_orient:+,loc_in_cds:250,codon_pos:1,codon:Cgc-Tgc,pep:R->C,Arg-84-Cys,(NSY)	1283	24	10.9	1259	24.7	0.4	< 0.0001	0.000218421		mTCE enriched outside India (4/66) =6.1%
	111006	Rv3407	antitoxin VapB47	Virulence, detoxification and adaptation	R->C,3	M1782_M1848_H1856_H2581_H3360_M2084_M2085_H2300_M2131	9	BEI	Rv3407	82	96	+	3826675	3826719	3	R->C,3	3826681	3826681:C->T	CDS,7000008460011889,7000008460011890,antitoxin VapB47,trans_orient:+,loc_in_cds:250,codon_pos:1,codon:Cgc-Tgc,pep:R->C,Arg-84-Cys,(NSY)	1283	24	10.9	1259	24.7	0.4	< 0.0001	0.000218421
	Red text shows rapidly evolving epitopes
	NOTE: All two strains have 10 identical mutations in the same position of the 8 antigens. Strains M2084 and M2085 were isolated on 06/2003 and 06/2003, respectively.
